# Supplementary material for: Proteogenomic Metabolism Dependent Signature Identifies Worse Outcome in Breast And Other Cancers
Source: Research Square preprint supplement (doi:10.21203/rs.3.rs-1443160/v1), 2022-03-17
Supplement: Supplementary file 1 [file 02d79a5de5ec4ca85f1604c6.xlsx]

## Sheet: Supplementary Table S12
Supplementary Table S12: Overall survival analysis by LT34 subtypes within each TCGA cancer
cohort	#samples_L	#samples_T	HR (95% CI) TN-like vs. Luminal-like	logrank P
BLCA	184	217	1.32 [0.97, 1.79]	0.074
BRCA	672	378	2.45 [1.65, 3.65]	5.2e-06
CESC	125	149	1.64 [0.98, 2.77]	0.058
COAD	214	223	1.02 [0.68, 1.53]	0.93
HNSC	222	295	1.47 [1.1, 1.97]	0.008
KIRC	243	277	1.47 [1.06, 2.04]	0.022
KIRP	146	132	5.12 [2.26, 11.64]	1.3e-05
LGG	238	245	1.79 [1.18, 2.74]	0.006
LIHC	173	177	2.24 [1.54, 3.26]	1.5e-05
LUAD	251	246	1.58 [1.17, 2.14]	0.0028
LUSC	229	257	1.04 [0.77, 1.39]	0.81
OV	148	152	1.06 [0.78, 1.46]	0.7
SARC	120	137	1.7 [1.1, 2.64]	0.017
THCA	236	262	0.75 [0.26, 2.14]	0.59
UCEC	260	266	2.39 [1.49, 3.82]	0.00019
