# Supplementary material for: Proteogenomic Metabolism Dependent Signature Identifies Worse Outcome in Breast And Other Cancers
Source: Research Square preprint supplement (doi:10.21203/rs.3.rs-1443160/v1), 2022-03-17
Supplement: Supplementary file 2 [file 38a9a04c9f1a84f714376953.xlsx]

## Sheet: pathways involved in 34 genes
KEGG pathways involved in any 34 genes
Genes in 34 genes	Annotation	KEGG pathway	KEGG pathway name	KEGG pathway class
ABAT	up-regulated in Luminal	hsa00410	beta-Alanine metabolism	Metabolism; Metabolism of other amino acids
ABAT	up-regulated in Luminal	hsa00640	Propanoate metabolism	Metabolism; Carbohydrate metabolism
ABAT	up-regulated in Luminal	hsa00650	Butanoate metabolism	Metabolism; Carbohydrate metabolism
ABAT	up-regulated in Luminal	hsa04727	GABAergic synapse	Organismal Systems; Nervous system
ABAT, ACADSB	up-regulated in Luminal	hsa00280	Valine, leucine and isoleucine degradation	Metabolism; Amino acid metabolism
ACADSB	up-regulated in Luminal	hsa00071	Fatty acid degradation	Metabolism; Lipid metabolism
ACADSB, HSD17B8	up-regulated in Luminal	hsa01212	Fatty acid metabolism
AHCYL1	up-regulated in Luminal	hsa00270	Cysteine and methionine metabolism	Metabolism; Amino acid metabolism
FIS1	up-regulated in Luminal	hsa04137	Mitophagy - animal	Cellular Processes; Transport and catabolism
HAGH	up-regulated in Luminal	hsa00620	Pyruvate metabolism	Metabolism; Carbohydrate metabolism
HSD17B8	up-regulated in Luminal	hsa00061	Fatty acid biosynthesis	Metabolism; Lipid metabolism
HSD17B8	up-regulated in Luminal	hsa00140	Steroid hormone biosynthesis	Metabolism; Lipid metabolism
NME3	up-regulated in Luminal	hsa00983	Drug metabolism - other enzymes	Metabolism; Xenobiotics biodegradation and metabolism
NME3, NT5C	up-regulated in Luminal	hsa00240	Pyrimidine metabolism	Metabolism; Nucleotide metabolism
PREX1	up-regulated in Luminal	hsa04062	Chemokine signaling pathway	Organismal Systems; Immune system
PREX1	up-regulated in Luminal	hsa05167	Kaposi sarcoma-associated herpesvirus infection	Human Diseases; Infectious disease: viral
SSH3	up-regulated in Luminal	hsa04360	Axon guidance	Organismal Systems; Development and regeneration
SSH3	up-regulated in Luminal	hsa04810	Regulation of actin cytoskeleton	Cellular Processes; Cell motility
THSD4	up-regulated in Luminal	hsa04350	TGF-beta signaling pathway	Environmental Information Processing; Signal transduction
ASNS	up-regulated in TN	hsa01230	Biosynthesis of amino acids
FSCN1	up-regulated in TN	hsa05206	MicroRNAs in cancer	Human Diseases; Cancer: overview
GART	up-regulated in TN	hsa01523	Antifolate resistance	Human Diseases; Drug resistance: antineoplastic
GART, MTHFD2, MTHFD1L	up-regulated in TN	hsa00670	One carbon pool by folate	Metabolism; Metabolism of cofactors and vitamins
KPNA2	up-regulated in TN	hsa05164	Influenza A	Human Diseases; Infectious disease: viral
KPNA2	up-regulated in TN	hsa05207	Chemical carcinogenesis - receptor activation	Human Diseases; Cancer: overview
NCBP1	up-regulated in TN	hsa03015	mRNA surveillance pathway	Genetic Information Processing; Translation
NCBP1	up-regulated in TN	hsa03040	Spliceosome	Genetic Information Processing; Transcription
NCBP1	up-regulated in TN	hsa05014	Amyotrophic lateral sclerosis	Human Diseases; Neurodegenerative disease
NCBP1, KPNA2	up-regulated in TN	hsa03013	Nucleocytoplasmic transport	Genetic Information Processing; Translation
PLOD1	up-regulated in TN	hsa00310	Lysine degradation	Metabolism; Amino acid metabolism
SLC2A1	up-regulated in TN	hsa04066	HIF-1 signaling pathway	Environmental Information Processing; Signal transduction
SLC2A1	up-regulated in TN	hsa04911	Insulin secretion	Organismal Systems; Endocrine system
SLC2A1	up-regulated in TN	hsa04919	Thyroid hormone signaling pathway	Organismal Systems; Endocrine system
SLC2A1	up-regulated in TN	hsa04920	Adipocytokine signaling pathway	Organismal Systems; Endocrine system
SLC2A1	up-regulated in TN	hsa04922	Glucagon signaling pathway	Organismal Systems; Endocrine system
SLC2A1	up-regulated in TN	hsa04931	Insulin resistance	Human Diseases; Endocrine and metabolic disease
SLC2A1	up-regulated in TN	hsa04976	Bile secretion	Organismal Systems; Digestive system
SLC2A1	up-regulated in TN	hsa05166	Human T-cell leukemia virus 1 infection	Human Diseases; Infectious disease: viral
SLC2A1	up-regulated in TN	hsa05200	Pathways in cancer	Human Diseases; Cancer: overview
SLC2A1	up-regulated in TN	hsa05211	Renal cell carcinoma	Human Diseases; Cancer: specific types
SLC2A1	up-regulated in TN	hsa05230	Central carbon metabolism in cancer	Human Diseases; Cancer: overview
SLC2A1	up-regulated in TN	hsa05415	Diabetic cardiomyopathy	Human Diseases; Cardiovascular disease
SRPK1	up-regulated in TN	hsa05168	Herpes simplex virus 1 infection	Human Diseases; Infectious disease: viral
TJP2	up-regulated in TN	hsa04530	Tight junction	Cellular Processes; Cellular community - eukaryotes
TJP2	up-regulated in TN	hsa05110	Vibrio cholerae infection	Human Diseases; Infectious disease: bacterial
ABAT, ACADSB, NME3, GMPR2, HSD17B8, HAGH, AHCYL1, NT5C, GART, PNP, MTHFD2, PLOD1, ASNS, MTHFD1L	mixed	hsa01100	Metabolic pathways
ABAT, ASNS	mixed	hsa00250	Alanine, aspartate and glutamate metabolism	Metabolism; Amino acid metabolism
NME3, GMPR2, NT5C, GART, PNP	mixed	hsa00230	Purine metabolism	Metabolism; Nucleotide metabolism
NME3, MTHFD2, MTHFD1L	mixed	hsa01240	Biosynthesis of cofactors
NT5C, PNP	mixed	hsa00760	Nicotinate and nicotinamide metabolism	Metabolism; Metabolism of cofactors and vitamins

## Sheet: sign pathways with 34 genes
KEGG pathway over-representation analysis of 34 genes
ID	Description	GeneRatio	BgRatio	pvalue	p.adjust	qvalue	geneID	Count
hsa00670	One carbon pool by folate	3/24	20/8114	2.50828e-05	0.000697513	0.000596557	GART,MTHFD2,MTHFD1L	3
hsa00230	Purine metabolism	5/24	127/8114	2.90631e-05	0.000697513	0.000596557	NME3,GMPR2,NT5C,GART,PNP	5
hsa00760	Nicotinate and nicotinamide metabolism	2/24	36/8114	0.00496823	0.0629121	0.0538064	NT5C,PNP	2
hsa00250	Alanine, aspartate and glutamate metabolism	2/24	37/8114	0.00524268	0.0629121	0.0538064	ABAT,ASNS	2
hsa00280	Valine, leucine and isoleucine degradation	2/24	48/8114	0.00870543	0.0751798	0.0642985	ABAT,ACADSB	2
hsa01240	Biosynthesis of cofactors	3/24	153/8114	0.00995175	0.0751798	0.0642985	NME3, MTHFD2, MTHFD1L	3
hsa01212	Fatty acid metabolism	2/24	57/8114	0.0121196	0.0751798	0.0642985	3ACADSB, HSD17B8	2
hsa00240	Pyrimidine metabolism	2/24	58/8114	0.01253	0.0751798	0.0642985	NME3,NT5C	2
hsa03013	Nucleocytoplasmic transport	2/24	108/8114	0.0400501	0.213601	0.182685	NCBP1,KPNA2	2
