# Supplementary material for: Proteogenomic Metabolism Dependent Signature Identifies Worse Outcome in Breast And Other Cancers
Source: Research Square preprint supplement (doi:10.21203/rs.3.rs-1443160/v1), 2022-03-17
Supplement: Supplementary file 3 [file 38ed74abc611cc64366de614.xlsx]

## Sheet: variant_34genes
SAAVs involved in 34 genes from CPTAC proteogenomics data analysis, corresponding SupplementalTable 5 by Mertins et al.
Pass	Pass	Pass	Fail	Pass	Pass	Pass	Pass	Fail	Fail	Pass	Pass	Pass	Pass	Pass	Fail	Fail	Pass	Pass	Fail	Pass	Pass	Fail	Pass	Fail	Pass	Fail	Fail	Pass	Fail	Pass	Pass	Pass	Fail	Pass	Pass	Pass	Fail	Pass	Pass	Pass	Pass	Fail	Pass	Pass	Fail	Pass	Pass	Pass	Pass
YES	YES	YES	NO	NO	YES	YES	NO	NO	NO	NO	NO	YES	YES	NO	NO	NO	YES	YES	YES	YES	NO	NO	NO	NO	YES	NO	NO	YES	NO	YES	NO	YES	NO	YES	NO	YES	NO	YES	YES	YES	NO	NO	YES	YES	YES	NO	NO	NO	YES
Her2	Basal	LumB	LumB	Basal	Her2	Her2	LumA	LumB	LumB	Her2	LumA	Her2	LumA	Basal	Basal	LumA	Her2	LumB	Her2	Basal	LumB	LumA	Her2	LumB	Basal	LumA	Her2	LumA	Basal	LumA	LumB	Basal	Basal	LumB	LumA	Basal	LumB	LumA	LumB	LumA	Her2	LumB	Her2	LumA	Her2	LumA	LumB	LumA	LumB
1	1	1	2	2	2	3	3	3	4	4	4	5	5	5	6	6	6	7	7	7	8	8	8	9	9	9	10	10	10	11	11	11	12	12	12	13	13	13	14	14	14	15	15	15	16	16	16	17	17
1	2	3	4	5	6	7	8	9	10	11	12	13	14	15	16	17	18	19	20	21	22	23	24	25	26	27	28	29	30	31	32	33	34	35	36	37	38	39	40	41	42	43	44	45	46	47	48	49	50
AO-A12D.01TCGA	C8-A131.01TCGA	AO-A12B.01TCGA	E2-A10A.02TCGA	BH-A18Q.02TCGA	C8-A130.02TCGA	C8-A138.03TCGA	E2-A154.03TCGA	BH-A0BZ.03TCGA	A8-A09I.04TCGA	C8-A12L.04TCGA	A2-A0EX.04TCGA	AO-A12D.05TCGA	AN-A04A.05TCGA	BH-A0AV.05TCGA	A2-A0D0.06TCGA	BH-A0HK.06TCGA	C8-A12T.06TCGA	A8-A06Z.07TCGA	A2-A0D1.07TCGA	A2-A0CM.07TCGA	BH-A18U.08TCGA	A2-A0YI.08TCGA	A2-A0EQ.08TCGA	AR-A0TY.09TCGA	AR-A0U4.09TCGA	BH-A0HP.09TCGA	BH-A0EE.10TCGA	AO-A0J9.10TCGA	BH-A0E0.10TCGA	AR-A1AP.11TCGA	AN-A0FK.11TCGA	AO-A0J6.11TCGA	BH-A18V.12TCGA	A7-A13F.12TCGA	BH-A0E1.12TCGA	A7-A0CE.13TCGA	BH-A0C0.13TCGA	A2-A0YC.13TCGA	AO-A0JC.14TCGA	A8-A08Z.14TCGA	AR-A0TX.14TCGA	D8-A13Y.15TCGA	A8-A076.15TCGA	AO-A126.15TCGA	C8-A12P.16TCGA	BH-A0C1.16TCGA	A2-A0EY.16TCGA	AR-A1AW.17TCGA	AR-A1AV.17TCGA
																																				-3.4	6.2	-1
0.5	0.7	-1.3				4.8	-0.4	1.2
						-3	-0.4	2.4
									3.9	-0.6	-1.4
						-0.9	5.4	0.7				-0.3	2.2	1.5
																														1	1.9	4.7
-3.6	-1.3	5.9
																																							7.7	0.5	2.5
6.9	-0.3	-1.6										6.6	-1.7	7.9													5.2	3.7	0.9				-2.3	-1.9	8.7
						-2.8	2.9	-1.9							-1.8	4.9	4										-0.7	2	1	1.3	1.5	1.8	-1.2	3.9	-0.9	-3.3	0.4	3.4										-1	0.2
2.8	-3.5	2.9	-0.3	-7.4	-6.5	-6.3	-1.9	-9.9																			-8.3	3.3	-4.1	0.9	-7.9	-5.8	-3.2	7.3	1.6	-1.8	-5.8	4.1				-9.3	-5.8	-8.2
																																	-6	7.7	-0.4
-2.4	-2.3	-1.4	4.1	2.1	2.1	-3.3	-4.3	5.1	0.2	-0.5	-1	-1.9	4.9	0.6	-0.2	-0.3	3	-1.9	0	-3.5	5.4	3.6	-2	-1.8	-3.9	-1	3.8	-1.6	1.9	-6.7	-3.7	-1.6	-2.6	-0.2	-3.1	-2.7	-0.7	2.6	-4.9	3.4	-1	0.3	-4.3	1.2	-1.4	-3.3	-3.3	-5.8	0.1
			-4.5	-14.7	2.8										-9.5	-8.4	0.6																			-4.6	-2.9	5.6	4.7	-3.4	-3.5
2.3	1.7	0.1	-1.5	-1.1	2.5				-0.7	1.6	0.8																3.1	-0.3	0.3
1.5	2.2	-1	-0.6	-0.5	1.9													-0.2	-0.1	0.3	0.5	-1	2.7										2.9	0.9	0.8	-0.9	-1	0							-1.7	1.4	0
2	2.4	-0.7				1.5	-2	-12.3	-7.8	1.7	0.8	2.2	1.9	-0.5	-9.2	-4.2	2.1	1.5	-6.4	2				-10.2	1.2	-6.1	-10.8	1.4	-5	-1.1	-3.2	1	-2.2	-0.1	0	-6.9	-11.4	-5.2	-0.3	-0.3	-3.2	-7.8	-1.7	3.5	-6.4	2.6	0.1	-1.1	-0.5
[truncated: 95 more columns]

## Sheet: SpliceIsoforms_34genes
Splice isoforms involved in 34 genes from CPTAC proteogenomics data analysis, corresponding Supplemental Table 5 by Mertins et al. 2016.
Pass	Pass	Pass	Fail	Pass	Pass	Pass	Pass	Fail	Fail	Pass	Pass	Pass	Pass	Pass	Fail	Fail	Pass	Pass	Fail	Pass	Pass	Fail	Pass	Fail	Pass	Fail	Fail	Pass	Fail	Pass	Pass	Pass	Fail	Pass	Pass	Pass	Fail	Pass	Pass	Pass	Pass	Fail	Pass	Pass	Fail	Pass	Pass	Pass	Pass
YES	YES	YES	NO	NO	YES	YES	NO	NO	NO	NO	NO	YES	YES	NO	NO	NO	YES	YES	YES	YES	NO	NO	NO	NO	YES	NO	NO	YES	NO	YES	NO	YES	NO	YES	NO	YES	NO	YES	YES	YES	NO	NO	YES	YES	YES	NO	NO	NO	YES
Her2	Basal	LumB	LumB	Basal	Her2	Her2	LumA	LumB	LumB	Her2	LumA	Her2	LumA	Basal	Basal	LumA	Her2	LumB	Her2	Basal	LumB	LumA	Her2	LumB	Basal	LumA	Her2	LumA	Basal	LumA	LumB	Basal	Basal	LumB	LumA	Basal	LumB	LumA	LumB	LumA	Her2	LumB	Her2	LumA	Her2	LumA	LumB	LumA	LumB
1	1	1	2	2	2	3	3	3	4	4	4	5	5	5	6	6	6	7	7	7	8	8	8	9	9	9	10	10	10	11	11	11	12	12	12	13	13	13	14	14	14	15	15	15	16	16	16	17	17
1	2	3	4	5	6	7	8	9	10	11	12	13	14	15	16	17	18	19	20	21	22	23	24	25	26	27	28	29	30	31	32	33	34	35	36	37	38	39	40	41	42	43	44	45	46	47	48	49	50
AO-A12D.01TCGA	C8-A131.01TCGA	AO-A12B.01TCGA	E2-A10A.02TCGA	BH-A18Q.02TCGA	C8-A130.02TCGA	C8-A138.03TCGA	E2-A154.03TCGA	BH-A0BZ.03TCGA	A8-A09I.04TCGA	C8-A12L.04TCGA	A2-A0EX.04TCGA	AO-A12D.05TCGA	AN-A04A.05TCGA	BH-A0AV.05TCGA	A2-A0D0.06TCGA	BH-A0HK.06TCGA	C8-A12T.06TCGA	A8-A06Z.07TCGA	A2-A0D1.07TCGA	A2-A0CM.07TCGA	BH-A18U.08TCGA	A2-A0YI.08TCGA	A2-A0EQ.08TCGA	AR-A0TY.09TCGA	AR-A0U4.09TCGA	BH-A0HP.09TCGA	BH-A0EE.10TCGA	AO-A0J9.10TCGA	BH-A0E0.10TCGA	AR-A1AP.11TCGA	AN-A0FK.11TCGA	AO-A0J6.11TCGA	BH-A18V.12TCGA	A7-A13F.12TCGA	BH-A0E1.12TCGA	A7-A0CE.13TCGA	BH-A0C0.13TCGA	A2-A0YC.13TCGA	AO-A0JC.14TCGA	A8-A08Z.14TCGA	AR-A0TX.14TCGA	D8-A13Y.15TCGA	A8-A076.15TCGA	AO-A126.15TCGA	C8-A12P.16TCGA	BH-A0C1.16TCGA	A2-A0EY.16TCGA	AR-A1AW.17TCGA	AR-A1AV.17TCGA
1.8	1.1	1.2				2.7	0	-5.6				1.2	0.5	0.4							-1.1	-2.5	-1.6	-5	-1	-3.5
																																										5.4	-0.1	0.8	-7.5	-6.5	4.5
			2.8	-4.3	-0.6	4.3	-0.1	1.6	3.7	-0.9	-0.8										2.7	0.8	-2.4	-2.8	-2.9	4	1.8	-1.3	-0.8													-0.3	-0.6	1
[truncated: 92 more columns]

## Sheet: cis_trans_34genes
CNVs on RNA and protein of 34 genes, extracted from SupplementalTable 10 from Mertins et al. 2016.
Gene ID	Chromosome	mrna TRANS events (TRANS FDR<0.05)	mrna CIS correlation	mrna CIS Effect (CIS FDR<0.05)	proteome TRANS events (TRANS FDR<0.05)	proteome CIS correlation	proteome CIS Effect (CIS FDR<0.05)	Oncogenes/Tumor suppressors as annotated by Uniprot "proto-oncogene" or "tumor suppressor" key words OR listed in SuppTable2A/B byVogelstein et al., 2013	# of tumors with gene level copy number deletion [ LOG2(CNA)-1 ? -1 ] (out of total of 77 tumors)	# of tumors with gene level copy number loss [ LOG2(CNA)-1 ? -0.3 ] (out of total of 77 tumors)	# of tumors with gene level copy number gain [ LOG2(CNA)-1 ? 0.3 ] (out of total of 77 tumors)	# of tumors with gene level copy number amplification [ LOG2(CNA)-1 ? 1 ] (out of total of 77 tumors)	# of samples with long range CNA gain spanning gene of interest (CNA segment size greater 25% of chromosome arm; LOG2(CNA)-1 segment mean ? 0.3))	# of samples with long range CNA loss spanning gene of interest (CNA segment size greater 25% of chromosome arm; CNA(LOG2)-1 segment mean smaller or equal to -0.3))
STARD10	11q13	16	0.3713	TRUE	5	0.3764	TRUE	NA	0	16	13	2	2	6
SSH3	11q13	18	0.5705	TRUE	7	0.4908	TRUE	NA	0	9	13	3	3	5
GART	21q22.11	42	0.6156	TRUE	9	0.5712	TRUE	NA	0	2	8	1	6	2
SRPK1	6p21.31	113	0.5565	TRUE	16	0.3473	TRUE	NA	0	6	10	1	7	5
ANKS1A	6p21.31	130	0.6559	TRUE	11	0.6087	TRUE	NA	0	5	9	1	7	5
CIRBP	19p13.3	347	0.552	TRUE	176	0.4564	TRUE	NA	0	21	0	0	0	6
PNP	14q11.2	20	0.3067	TRUE	5	0.2951	TRUE	NA	0	9	11	0	2	3
NCBP1	9q34.1	64	0.6331	TRUE	1	0.284	TRUE	NA	0	12	1	0	1	11
GMPR2	14q11.2	82	0.6553	TRUE	7	0.3193	TRUE	NA	0	10	7	0	2	3
KPNA2	17q24.2	83	0.5831	TRUE	34	0.4432	TRUE	NA	0	3	21	2	12	3
NME3	16q13.3	161	0.5448	TRUE	41	0.5116	TRUE	NA	0	4	27	0	18	2
PHPT1	9q34.3	55	0.2445	TRUE	3	0.383	TRUE	NA	0	8	3	0	1	2
HAGH	16p13.3	131	0.6071	TRUE	40	0.4669	TRUE	NA	0	4	27	0	18	2
ABAT	16p13.2	218	0.4728	TRUE	36	0.4542	TRUE	NA	0	3	27	0	21	2
TIA1	2p13	520	0.6025	TRUE	19	0.3475	TRUE	NA	0	3	4	0	2	2
MTHFD2	2p13.1	552	0.5557	TRUE	19	0.5093	TRUE	NA	0	3	4	0	2	2
ASNS	7q21.3	113	0.2394	FALSE	6	0.3272	TRUE	NA	0	8	10	0	8	8
MLPH	2q37.2	16	0.3	TRUE	3	0.0885	FALSE	NA	0	13	2	0	0	1
TJP2	9q13-q21	50	0.4522	TRUE	0	0.206	FALSE	NA	0	12	2	0	1	9
ADIRF	10q23.31	58	0.3406	TRUE	1	0.1969	FALSE	NA	1	12	1	0	1	7
AHCYL1	1p13	133	0.3452	TRUE	2	0.2467	FALSE	NA	0	14	2	0	1	6
SLC2A1	1p34.2	427	0.5109	TRUE	3	0.1506	FALSE	NA	0	10	6	1	2	9
MTHFD1L	6q25.1	38	0.275	TRUE	1	0.2244	FALSE	NA	0	9	6	0	3	7
PLOD1	1p36.22	84	0.3426	TRUE	8	0.1105	FALSE	NA	0	24	3	0	1	7
FIS1	7q22.1	109	0.5414	TRUE	5	0.1026	FALSE	NA	0	11	8	0	7	8
THSD4	15q23	141	0.3301	TRUE	2	0.2243	FALSE	NA	0	17	1	0	1	13
REEP6	19p13.3	226	0.3403	TRUE	85	0.2455	FALSE	NA	1	19	1	0	0	6
ACADSB	10q26.13	38	0.1599	FALSE	2	0.1744	FALSE	NA	1	9	4	0	0	4
AGR3	7p21.1	89	-0.0718	FALSE	1	-0.0006	FALSE	NA	0	3	9	0	7	3
FSCN1	7p22	52	-0.007	FALSE	2	-0.1443	FALSE	NA	0	6	10	0	5	5
MDP1	14q12	NA	0.5487	TRUE	NA	NA	NA	NA	0	10	7	0	2	3
