# Supplementary material for: Proteogenomic Metabolism Dependent Signature Identifies Worse Outcome in Breast And Other Cancers
Source: Research Square preprint supplement (doi:10.21203/rs.3.rs-1443160/v1), 2022-03-17
Supplement: Supplementary file 4 [file 6831258f3acacdbd32ffca10.xlsx]

## Sheet: Supplementary Table S10
Supplementary Table S10: Overall survival analysis between Luminal-like and TN-like in each clinical group
clinical characteristics	group	#samples_L	#samples_T	HR (95% CI) TN-like vs. Luminal-like	logrank P
IHC subtype	ER+HER2+	260	248	2.4 [1.4 ,4.1]	0.00092
IHC subtype	ER+HER2-	3653	717	2.2 [1.8 ,2.6]	4.2e-15
Grade	G2	1859	320	2.1 [1.5 ,2.8]	1e-06
Grade	G3	809	1078	2.1 [1.7 ,2.5]	1.4e-11
Stage	S1	1625	541	2.2 [1.6 ,3]	1.1e-06
Stage	S2	1347	761	2.3 [1.8 ,2.8]	2e-15
Stage	S3	211	138	3.3 [2.2 ,5]	4.2e-09
PAM50|CLAUDIN	LuminalA	2581	190	1.9 [1.3 ,2.8]	0.001
PAM50|CLAUDIN	LuminalB	968	380	1.7 [1.3 ,2.2]	0.00023
PAM50|CLAUDIN	HER2-enriched	95	451	2.1 [1.2 ,3.9]	0.0099
PAM50|CLAUDIN	Claudin-low	51	140	4.6 [1.4 ,15]	0.0057
