# Supplementary material for: Proteogenomic Metabolism Dependent Signature Identifies Worse Outcome in Breast And Other Cancers
Source: Research Square preprint supplement (doi:10.21203/rs.3.rs-1443160/v1), 2022-03-17
Supplement: Supplementary file 5 [file 7e00551e60601ec50aafdae5.xlsx]

## Sheet: Supplementary Table S7
Supplementary Table S7: The survival difference among LT34 subtypes (OS/PFI/PFS/RFS)
OS: overall survival; PFI: progression free interval; PFS: progression free survival; RFS: relapse free survival
Cohort	Survival Type	Subtype1	#samples in Subtype1	Subtype2	#samples in Subtype2	HR (95% CI) Subtype2 vs. Subtype1	log-rank P
TCGA	OS	L/L	533	L/T	97	2.15 [1.11, 4.18]	0.02
TCGA	OS	L/L	533	T/T	160	2.6 [1.54, 4.38]	0.00021
TCGA	OS	L/T	97	T/T	160	1.2 [0.6, 2.38]	0.61
METABRIC	OS	L/L	1139	L/T	209	2.24 [1.66, 3.01]	4.6e-08
METABRIC	OS	L/L	1139	T/T	288	2.8 [2.18, 3.61]	7.3e-17
METABRIC	OS	L/T	209	T/T	288	1.26 [0.91, 1.74]	0.16
GSE96058	OS	L/L	1981	L/T	411	2.19 [1.64, 2.92]	4.5e-08
GSE96058	OS	L/L	1981	T/T	137	3.25 [2.21, 4.79]	2.1e-10
GSE96058	OS	L/T	411	T/T	137	1.49 [0.97, 2.28]	0.067
Merged cohorts	OS	L/L	3653	L/T	717	2.16 [1.77, 2.63]	4.2e-15
Merged cohorts	OS	L/L	3653	T/T	585	3.35 [2.77, 4.06]	9e-40
Merged cohorts	OS	L/T	717	T/T	585	1.54 [1.22, 1.94]	0.00022
TCGA	PFI	L/L	533	L/T	97	1.42 [0.75, 2.67]	0.27
TCGA	PFI	L/L	533	T/T	160	1.97 [1.24, 3.11]	0.0033
TCGA	PFI	L/T	97	T/T	160	1.38 [0.71, 2.71]	0.34
TCGA	PFS	L/L	533	L/T	97	1.47 [0.85, 2.54]	0.17
TCGA	PFS	L/L	533	T/T	160	1.79 [1.18, 2.71]	0.0057
TCGA	PFS	L/T	97	T/T	160	1.22 [0.67, 2.21]	0.52
METABRIC	RFS	L/L	1139	L/T	209	2.03 [1.54, 2.68]	3.1e-07
METABRIC	RFS	L/L	1139	T/T	288	2.36 [1.85, 3]	6.5e-13
METABRIC	RFS	L/T	209	T/T	288	1.16 [0.85, 1.59]	0.34
