# Supplementary material for: Proteogenomic Metabolism Dependent Signature Identifies Worse Outcome in Breast And Other Cancers
Source: Research Square preprint supplement (doi:10.21203/rs.3.rs-1443160/v1), 2022-03-17
Supplement: Supplementary file 6 [file d366a4f5e66016e4e76e9c21.xlsx]

## Sheet: Supplementary Table S9
Supplementary Table S9: Overall survival difference among LT34 subtypes within treatment.
cohort	treatments	Subtype1	#samples in Subtype1	Subtype2	#samples in Subtype2	HR (95% CI) Subtype2 vs. Subtype 1	logrank P
METABRIC	HT	L/L	293	L/T	59	1.77 [1.01, 3.11]	0.044
METABRIC	RT	L/L	137	T/T	49	2.62 [1.01, 6.8]	0.039
METABRIC	HT+RT	L/L	434	L/T	69	2.01 [1.2, 3.36]	0.0066
METABRIC	HT+RT	L/L	434	T/T	27	2.33 [1.11, 4.86]	0.021
METABRIC	HT+RT	L/T	69	T/T	27	1.17 [0.51, 2.67]	0.71
METABRIC	CT+HT+RT	L/L	64	L/T	26	4.38 [1.56, 12.31]	0.0022
METABRIC	CT+HT+RT	L/L	64	T/T	33	6.82 [2.66, 17.48]	3.6e-06
METABRIC	CT+HT+RT	L/T	26	T/T	33	1.57 [0.69, 3.54]	0.28
GSE96059	HT	L/L	1320	L/T	175	2.71 [1.9, 3.87]	1.1e-08
GSE96058	CT	L/T	30	T/T	92	1.22 [0.4, 3.71]	0.72
GSE96060	CT+HT	L/L	455	L/T	200	3.36 [1.73, 6.52]	0.00014
