# Supplementary material for: Proteogenomic Metabolism Dependent Signature Identifies Worse Outcome in Breast And Other Cancers
Source: Research Square preprint supplement (doi:10.21203/rs.3.rs-1443160/v1), 2022-03-17
Supplement: Supplementary file 7 [file db4c1f2fa278257148b4f34b.xlsx]

## Sheet: TN vs. LA
Consensus Significantly Differentially Expressed Proteins for TN vs. LA
Protein Accession	Definition	geneID	Gene Symbol	adj.P_representative	log2FC_representative (TN/LA)	log2FC (range)
4501859	acyl-CoA dehydrogenase, short/branched chain(ACADSB)	36	ACADSB	0.00227358	-2.76622	[-3.72824376842457, -2.76622469161662]
4502281	ATPase Na+/K+ transporting subunit beta 3(ATP1B3)	483	ATP1B3	0.0419007	1.30376	[1.30375774587104, 2.14550470999584]
4502337	alpha-2-glycoprotein 1, zinc-binding(AZGP1)	563	AZGP1	0.00674065	-4.91971	[-7.59477509344318, -4.91970769037462]
4502419	biliverdin reductase B(BLVRB)	645	BLVRB	0.0340134	-1.28247	[-2.23315615188231, -1.28246657128313]
4502565	calpain small subunit 1(CAPNS1)	826	CAPNS1	0.0474822	-0.988213	[-1.5603364314918, -0.988212984336817]
4502847	cold inducible RNA binding protein(CIRBP)	1153	CIRBP	0.000141479	-2.54855	[-3.12682518988751, -2.54855088622807]
4503107	cystatin C(CST3)	1471	CST3	0.00996162	-2.10359	[-3.30978058033024, -2.10358621354117]
4503211	cytochrome P450 family 27 subfamily A member 1(CYP27A1)	1593	CYP27A1	0.00216241	2.05824	[2.05824398279205, 3.01961644255297]
4503249	DEK proto-oncogene(DEK)	7913	DEK	9.25e-05	2.09267	[2.09267259585264, 2.80274397929364]
4503351	DNA methyltransferase 1(DNMT1)	1786	DNMT1	0.00927145	1.03136	[1.03135652721296, 1.43069004909284]
4503481	eukaryotic translation elongation factor 1 gamma(EEF1G)	1937	EEF1G	0.00365666	1.39723	[1.39722659781418, 2.05557535225537]
4503483	eukaryotic translation elongation factor 2(EEF2)	1938	EEF2	0.00934549	0.998107	[0.998106706619048, 1.45408570066931]
4503507	eukaryotic translation initiation factor 2 subunit gamma(EIF2S3)	1968	EIF2S3	0.0200825	0.751337	[0.751336823876471, 1.04840228467299]
4503529	eukaryotic translation initiation factor 4A1(EIF4A1)	1973	EIF4A1	0.00165771	1.04647	[1.0464703083393, 1.37097376764875]
4503571	enolase 1(ENO1)	2023	ENO1	0.000483681	2.42122	[2.42121645246206, 3.23475380666422]
4503843	adaptor related protein complex 1 gamma 2 subunit(AP1G2)	8906	AP1G2	0.0158047	-0.985018	[-1.47518450160333, -0.985017767860964]
4503909	guanidinoacetate N-methyltransferase(GAMT)	2593	GAMT	4.9e-05	-2.6801	[-3.24803966560786, -2.68009698843582]
4504191	mutS homolog 6(MSH6)	2956	MSH6	0.00199099	1.8817	[1.88170499570179, 2.49158709493582]
4504279	H3 histone family member 3A(H3F3A)	3020	H3F3A	0.00532276	-1.69714	[-2.45837837565008, -1.69713976932694]
4504511	DnaJ heat shock protein family (Hsp40) member A1(DNAJA1)	3301	DNAJA1	0.00885627	0.982294	[0.982293935454158, 1.47855340850177]
4505047	lumican(LUM)	4060	LUM	0.0165093	-3.09613	[-5.08062460025117, -3.09613219401226]
4505061	mannose-6-phosphate receptor, cation dependent(M6PR)	4074	M6PR	0.00951598	1.08084	[1.08083618671406, 1.60992660235018]
4505087	mago homolog, exon junction complex core component(MAGOH)	4116	MAGOH	0.0311683	0.816407	[0.816406930765352, 1.39155807837927]
4505145	malic enzyme 2(ME2)	4200	ME2	0.000899356	1.60432	[1.60432153908285, 2.18153298175528]
4505235	mannose phosphate isomerase(MPI)	4351	MPI	0.0180101	-1.23512	[-1.88390573726417, -1.23512312127718]
4505343	nuclear cap binding protein subunit 1(NCBP1)	4686	NCBP1	0.00218942	1.43096	[1.43096098700867, 2.03095938555234]
4505621	phosphatidylethanolamine binding protein 1(PEBP1)	5037	PEBP1	0.0130069	-1.31131	[-1.92417545184038, -1.31130878096324]
4505891	procollagen-lysine,2-oxoglutarate 5-dioxygenase 3(PLOD3)	8985	PLOD3	0.00602766	1.30049	[1.30049331482955, 1.86965336713758]
4506013	protein phosphatase 1 regulatory subunit 7(PPP1R7)	5510	PPP1R7	0.00995129	-0.864243	[-1.24395263527447, -0.864242781677093]
4506019	protein phosphatase 2 regulatory subunit Balpha(PPP2R2A)	5520	PPP2R2A	0.00879593	-1.35445	[-2.11856408507726, -1.35445094252728]
4506597	ribosomal protein L12(RPL12)	6136	RPL12	0.0144862	0.670727	[0.670726914983623, 0.961737810761219]
4506613	ribosomal protein L22(RPL22)	6146	RPL22	0.0125757	0.884281	[0.884281326428267, 1.36342879823713]
4506619	ribosomal protein L24(RPL24)	6152	RPL24	0.0336854	1.05506	[1.05505572896164, 1.65383967437819]
4506631	ribosomal protein L30(RPL30)	6156	RPL30	0.0266694	0.726871	[0.726870562422184, 1.02693940443272]
4506645	ribosomal protein L38(RPL38)	6169	RPL38	0.00836207	0.957768	[0.957767799776496, 1.37451218818437]
4506649	ribosomal protein L3(RPL3)	6122	RPL3	0.0213542	1.5079	[1.50790269414337, 2.37334637384911]
4506661	ribosomal protein L7a(RPL7A)	6130	RPL7A	0.0308465	0.872189	[0.872188676866955, 1.28073258462812]
4506681	ribosomal protein S11(RPS11)	6205	RPS11	0.0185513	0.940441	[0.940440848173192, 1.44223847663089]
4506685	ribosomal protein S13(RPS13)	6207	RPS13	0.0314616	0.713325	[0.71332531297559, 1.08721038399343]
4506691	ribosomal protein S16(RPS16)	6217	RPS16	0.0291004	0.922706	[0.922706018009713, 1.51562061944447]
4506693	ribosomal protein S17(RPS17)	6218	RPS17	0.0222059	0.816536	[0.816535621302385, 1.15970854015861]
4506707	ribosomal protein S25(RPS25)	6230	RPS25	0.0481556	0.819636	[0.819635533317414, 1.28467889802872]
4506717	ribosomal protein S29(RPS29)	6235	RPS29	0.0168702	1.0686	[1.06860177623609, 1.56214869427023]
4506741	ribosomal protein S7(RPS7)	6201	RPS7	0.0186798	0.878752	[0.878752196197849, 1.35529099214467]
4506743	ribosomal protein S8(RPS8)	6202	RPS8	0.0363865	0.838591	[0.838590970276197, 1.33543779533811]
4506925	SH3 domain binding glutamate rich protein like(SH3BGRL)	6451	SH3BGRL	0.0118968	-2.13416	[-3.20365420007376, -2.13415524145425]
4507115	fascin actin-bundling protein 1(FSCN1)	6624	FSCN1	0.00370641	2.30491	[2.30491207362099, 3.42130497588997]
4507149	superoxide dismutase 1, soluble(SOD1)	6647	SOD1	0.0270503	-1.26106	[-2.08345669218383, -1.26105645895268]
4507157	sortilin related receptor 1(SORL1)	6653	SORL1	0.0394348	-1.16772	[-1.94212071600575, -1.16772011508137]
4507185	sepiapterin reductase (7,8-dihydrobiopterin:NADP+ oxidoreductase)(SPR)	6697	SPR	0.00556526	-1.88798	[-2.92614440835031, -1.8879799415678]
4507241	structure specific recognition protein 1(SSRP1)	6749	SSRP1	0.000623245	1.76304	[1.76304393651808, 2.35094482920853]
4507645	triosephosphate isomerase 1(TPI1)	7167	TPI1	0.0372007	0.935047	[0.935047328724164, 1.49204975318958]
4507709	tissue specific transplantation antigen P35B(TSTA3)	7264	TSTA3	0.0464449	-1.09239	[-1.77080978335455, -1.09239381459663]
4507801	small ubiquitin-like modifier 1(SUMO1)	7341	SUMO1	0.00134816	1.57397	[1.57397484442433, 2.152773663284]
4507813	UDP-glucose 6-dehydrogenase(UGDH)	7358	UGDH	0.0476352	-2.25547	[-3.37408575050508, -2.25547307080319]
4507947	tyrosyl-tRNA synthetase(YARS)	8565	YARS	0.00188474	1.19338	[1.19337885617858, 1.62805933378669]
4557587	fumarylacetoacetate hydrolase(FAH)	2184	FAH	0.0108381	-1.92245	[-2.77423721854632, -1.92245467971129]
4557761	mutS homolog 2(MSH2)	4436	MSH2	0.00679431	1.25382	[1.25382056423446, 1.8747648824991]
4557831	pterin-4 alpha-carbinolamine dehydratase 1(PCBD1)	5092	PCBD1	0.0291503	-1.37979	[-2.13685521958272, -1.37979396484837]
4757826	beta-2-microglobulin(B2M)	567	B2M	0.0107302	2.18342	[2.18341908534019, 3.3271913143249]
4758092	chitobiase(CTBS)	1486	CTBS	0.040353	-1.33778	[-2.31411097481459, -1.33778175824522]
4758344	Fc fragment of IgE receptor Ig(FCER1G)	2207	FCER1G	0.0255656	1.64089	[1.64089211624443, 2.68673251026663]
4758356	flap structure-specific endonuclease 1(FEN1)	2237	FEN1	0.00174159	2.52709	[2.52708936864858, 3.44840274784675]
4758442	glia maturation factor beta(GMFB)	2764	GMFB	0.00610635	-1.1457	[-1.66366831500777, -1.14569659682765]
4758556	pre-mRNA processing factor 3(PRPF3)	9129	PRPF3	0.0475948	0.80715	[0.807150197532197, 1.35310820728932]
4758668	serine palmitoyltransferase long chain base subunit 2(SPTLC2)	9517	SPTLC2	0.0303373	-1.04618	[-1.53112871625827, -1.04617954182411]
4759224	programmed cell death 5(PDCD5)	9141	PDCD5	0.0326984	0.840175	[0.840174986658885, 1.39954572557359]
4826830	methyl-CpG binding protein 2(MECP2)	4204	MECP2	0.0439143	-1.25493	[-2.1153385042686, -1.25493342237074]
4826876	osteomodulin(OMD)	4958	OMD	0.0402797	-2.79397	[-4.52061880591698, -2.79396907480588]
4885281	glutamate dehydrogenase 1(GLUD1)	2746	GLUD1	0.00774669	-1.86052	[-2.67396936075002, -1.86051846360385]
4885373	histone cluster 1 H1 family member a(HIST1H1A)	3024	HIST1H1A	0.000442269	5.41549	[5.41548828751214, 7.21144443267888]
4885381	histone cluster 1 H1 family member b(HIST1H1B)	3009	HIST1H1B	0.00263482	2.00598	[2.0059767751752, 2.87816968115755]
5031855	lymphocyte cytosolic protein 2(LCP2)	3937	LCP2	0.0192121	1.52576	[1.52575734388893, 2.30636835335187]
5032007	purine rich element binding protein A(PURA)	5813	PURA	0.00679621	-1.43678	[-1.90261319125565, -1.43677505813586]
5032027	RB binding protein 4, chromatin remodeling factor(RBBP4)	5928	RBBP4	0.0263124	0.963684	[0.963683922545144, 1.73508591602182]
5032041	Ras homolog enriched in brain(RHEB)	6009	RHEB	0.0102881	1.51814	[1.51813610781595, 2.34293692895224]
5032189	tumor protein p53 binding protein 1(TP53BP1)	7158	TP53BP1	0.0445068	-0.682165	[-1.09152279325422, -0.682164894997173]
5174447	receptor for activated C kinase 1(RACK1)	10399	RACK1	0.0116569	0.943554	[0.943554330141307, 1.41355108777585]
5453555	RAN, member RAS oncogene family(RAN)	5901	RAN	0.00704676	1.16165	[1.161654634731, 1.71818288775466]
5453593	CAP, adenylate cyclase-associated protein, 2 (yeast)(CAP2)	10486	CAP2	0.028147	-1.97359	[-3.16604605655232, -1.97359033722804]
5453872	platelet derived growth factor receptor like(PDGFRL)	5157	PDGFRL	0.0148223	-2.15126	[-3.38454065415123, -2.15125625498079]
5453880	acidic nuclear phosphoprotein 32 family member A(ANP32A)	8125	ANP32A	0.0344188	-1.03626	[-1.64143031941016, -1.03626353271134]
5454088	acidic nuclear phosphoprotein 32 family member B(ANP32B)	10541	ANP32B	9.54e-05	2.18029	[2.18029430397934, 2.72229610345737]
5454090	signal sequence receptor subunit 4(SSR4)	6748	SSR4	0.0328641	1.44164	[1.44163511268192, 2.51272651858652]
5729730	apoptosis inhibitor 5(API5)	8539	API5	0.0342113	0.846436	[0.846436126199423, 1.35821134532236]
5729770	tripeptidyl peptidase 1(TPP1)	1200	TPP1	0.0230372	-1.39608	[-2.27548391678805, -1.39608365134899]
5729779	COP9 signalosome subunit 8(COPS8)	10920	COPS8	0.0479537	-0.731954	[-1.23908440668374, -0.731954408703525]
5802976	adipogenesis regulatory factor(ADIRF)	10974	ADIRF	0.00548931	-4.35402	[-6.61403899412385, -4.35402377818233]
6005757	SPT16 homolog, facilitates chromatin remodeling subunit(SUPT16H)	11198	SUPT16H	0.00130114	1.63589	[1.63589380229296, 2.24294674883055]
6912328	dimethylarginine dimethylaminohydrolase 1(DDAH1)	23576	DDAH1	0.0247788	-1.73623	[-2.8871153988917, -1.73622953502071]
6912356	echinoderm microtubule associated protein like 2(EML2)	24139	EML2	0.00995942	-1.99387	[-2.986155903424, -1.99387209619832]
6996021	cytochrome b-245 beta chain(CYBB)	1536	CYBB	0.010821	2.67879	[2.67879089601615, 3.85473387776097]
7019419	G protein nucleolar 2(GNL2)	29889	GNL2	0.00906723	1.99057	[1.99056565236243, 2.85213671078771]
7427519	minichromosome maintenance complex component 6(MCM6)	4175	MCM6	0.000983691	3.42685	[3.42685485822171, 4.41798388159799]
7656952	calcyclin binding protein(CACYBP)	27101	CACYBP	0.00244067	2.07709	[2.07708926750928, 3.06156092510387]
7657033	5', 3'-nucleotidase, cytosolic(NT5C)	30833	NT5C	0.00386959	-1.2905	[-1.73711547952877, -1.29050179558298]
7657069	endoplasmic reticulum oxidoreductase 1 alpha(ERO1A)	30001	ERO1A	0.0169681	1.49071	[1.49070936396075, 2.32678694361174]
7657339	molybdenum cofactor synthesis 3(MOCS3)	27304	MOCS3	0.0139404	-1.11211	[-1.58605035899471, -1.11210649514271]
7661786	NADH:ubiquinone oxidoreductase complex assembly factor 4(NDUFAF4)	29078	NDUFAF4	0.0205151	1.26203	[1.26202812094747, 2.14958705915358]
7661920	eukaryotic translation initiation factor 4A3(EIF4A3)	9775	EIF4A3	0.00716383	1.07547	[1.07547231040433, 1.54153993371594]
7705373	LIM domain and actin binding 1(LIMA1)	51474	LIMA1	0.0159434	-1.61968	[-2.36143865118967, -1.61967622346713]
7705437	NIP7, nucleolar pre-rRNA processing protein(NIP7)	51388	NIP7	0.00912079	1.4825	[1.48249643945877, 2.09453085503325]
7705558	inositol-3-phosphate synthase 1(ISYNA1)	51477	ISYNA1	0.0192732	-1.16287	[-1.7539767499664, -1.16286816524639]
7705696	thioredoxin domain containing 12(TXNDC12)	51060	TXNDC12	0.00328615	1.30243	[1.30242903425427, 1.83624493380355]
7705855	hydroxysteroid 17-beta dehydrogenase 12(HSD17B12)	51144	HSD17B12	0.0142989	1.05409	[1.05408908864502, 1.78555916274796]
7705877	hematological and neurological expressed 1(HN1)	51155	HN1	0.0084098	2.48362	[2.48361837089797, 3.57746974893095]
7706706	sorting nexin 9(SNX9)	51429	SNX9	0.0108611	-1.10351	[-1.57725587193604, -1.10351339086437]
8393638	F11 receptor(F11R)	50848	F11R	0.0427245	1.37165	[1.37165284765517, 2.41403257204527]
8394376	syntaxin 18(STX18)	53407	STX18	0.0350913	-1.02476	[-1.65532795586612, -1.02475793471488]
8922498	pyridoxamine 5'-phosphate oxidase(PNPO)	55163	PNPO	0.0242869	-1.40147	[-2.45513856855319, -1.40147071428106]
8923904	bridging integrator 3(BIN3)	55909	BIN3	0.0181901	-1.17384	[-2.07169293076181, -1.1738411002085]
9665248	transporter 1, ATP binding cassette subfamily B member(TAP1)	6890	TAP1	0.000598927	2.50649	[2.50649406150291, 3.40281835638394]
10337595	protein phosphatase, Mg2+/Mn2+ dependent 1A(PPM1A)	5494	PPM1A	0.00453322	-0.985607	[-1.38211380816186, -0.985606667146661]
11095441	aldehyde dehydrogenase 6 family member A1(ALDH6A1)	4329	ALDH6A1	0.000109827	-2.80469	[-3.60741926076123, -2.80469412899587]
11321591	high mobility group box 2(HMGB2)	3148	HMGB2	0.00669518	2.22384	[2.22384376395473, 3.46959950298277]
11321601	phosphofructokinase, platelet(PFKP)	5214	PFKP	0.000480787	2.71921	[2.71920795904245, 3.57673801134421]
11415026	ribosomal protein L18a(RPL18A)	6142	RPL18A	0.0404751	0.749106	[0.749105738985252, 1.17717693298725]
11545855	ribokinase(RBKS)	64080	RBKS	0.0231132	-2.20596	[-3.56957077150374, -2.20596398016948]
12669909	acyl-CoA synthetase long-chain family member 4(ACSL4)	2182	ACSL4	0.0222554	1.45911	[1.4591096928473, 2.28298738861888]
13375746	acidic residue methyltransferase 1(ARMT1)	79624	ARMT1	0.0264894	-2.34445	[-3.45202865378637, -2.34444539885523]
13376854	UBX domain protein 6(UBXN6)	80700	UBXN6	0.00469132	-1.19341	[-1.76566340232336, -1.19340752390835]
13569843	nucleolar protein 7(NOL7)	51406	NOL7	0.00533034	1.21084	[1.21084296870382, 1.77508693627693]
13676857	heat shock protein family A (Hsp70) member 2(HSPA2)	3306	HSPA2	0.0462827	-2.54468	[-4.11920481988587, -2.54467887803559]
13775595	tryptase alpha/beta 1(TPSAB1)	7177	TPSAB1	0.0239089	-2.62811	[-4.16239286234718, -2.62810650011178]
13904870	ribosomal protein S5(RPS5)	6193	RPS5	0.0251133	0.715342	[0.715341641434746, 1.04485594111645]
14141195	stromal cell derived factor 2(SDF2)	6388	SDF2	0.0306905	1.3472	[1.34720165001046, 2.53122839565416]
14150134	coiled-coil-helix-coiled-coil-helix domain containing 6(CHCHD6)	84303	CHCHD6	0.0392802	-1.06432	[-1.59499693867431, -1.06431920779609]
14150155	vacuolar protein sorting 25 homolog(VPS25)	84313	VPS25	0.0271873	-0.970848	[-1.53065996361209, -0.97084758169266]
14165469	ribosomal protein S15a(RPS15A)	6210	RPS15A	0.0253801	0.826518	[0.826518244636284, 1.21408717716499]
14249382	abhydrolase domain containing 14B(ABHD14B)	84836	ABHD14B	0.00531994	-1.72494	[-2.4885552044883, -1.72493943934894]
14249478	chromosome 1 open reading frame 198(C1orf198)	84886	C1orf198	0.0369743	1.27782	[1.27782273960302, 2.0630239688914]
14249614	synaptotagmin like 1(SYTL1)	84958	SYTL1	0.0246916	-1.36332	[-2.01283169753437, -1.3633235856621]
14249678	RNA binding motif protein 17(RBM17)	84991	RBM17	0.0147549	0.941134	[0.941133809135513, 1.35211364599835]
14249718	transcription elongation factor A like 3(TCEAL3)	85012	TCEAL3	0.00764432	-2.43155	[-3.46035206118096, -2.43155449367088]
14277700	ribosomal protein S12(RPS12)	6206	RPS12	0.025688	0.797319	[0.797318506723859, 1.19739094460382]
14591909	ribosomal protein L5(RPL5)	6125	RPL5	0.0200284	0.929139	[0.92913925242217, 1.38184936458333]
15011972	Rho guanine nucleotide exchange factor 1(ARHGEF1)	9138	ARHGEF1	0.0336115	0.982303	[0.982302624667266, 1.57459229170517]
15055539	ribosomal protein S2(RPS2)	6187	RPS2	0.0176765	0.934047	[0.934046696097704, 1.36094777030322]
15277342	hydroxysteroid 17-beta dehydrogenase 8(HSD17B8)	7923	HSD17B8	0.00477186	-1.7945	[-2.57380469481843, -1.79450334140335]
15431288	ribosomal protein L10a(RPL10A)	4736	RPL10A	0.0184008	0.849731	[0.849731096125437, 1.25512839789324]
15431303	ribosomal protein L9(RPL9)	6133	RPL9	0.0436042	0.622086	[0.622085951038862, 0.972207059341752]
15718687	ribosomal protein S3(RPS3)	6188	RPS3	0.0196508	0.943176	[0.943176075141316, 1.50072543492612]
16117791	ribosomal protein L35a(RPL35A)	6165	RPL35A	0.0329099	1.34593	[1.34593243964329, 2.22464629761242]
16418425	guanylate binding protein 5(GBP5)	115362	GBP5	0.0474651	1.65155	[1.65154925293785, 2.80974318111714]
16579885	ribosomal protein L4(RPL4)	6124	RPL4	0.038556	0.851844	[0.851843530835443, 1.34272764732321]
17149828	N(alpha)-acetyltransferase 15, NatA auxiliary subunit(NAA15)	80155	NAA15	0.00501632	1.05841	[1.05840505300052, 1.55161144500186]
17933772	S100 calcium binding protein A16(S100A16)	140576	S100A16	0.03522	-1.70458	[-2.50396757441024, -1.70457882826504]
19526773	autophagy related 3(ATG3)	64422	ATG3	0.00230929	1.2529	[1.2528978128498, 1.75589817333493]
19923599	calmin(CLMN)	79789	CLMN	0.0219261	-1.33246	[-1.94052048863115, -1.33245596035688]
19923881	glucosamine-6-phosphate deaminase 2(GNPDA2)	132789	GNPDA2	0.013636	-1.21335	[-1.74472145674571, -1.21335102237203]
19923919	receptor accessory protein 6(REEP6)	92840	REEP6	0.00179762	-5.1284	[-6.96974954789174, -5.12839661068008]
19923959	serine dehydratase like(SDSL)	113675	SDSL	0.0209805	-1.10041	[-1.79135861604951, -1.10041279274334]
20070186	phosphotriesterase related(PTER)	9317	PTER	0.0125282	-1.59021	[-2.39535292191891, -1.59021305071094]
20149675	EF-hand domain family member D2(EFHD2)	79180	EFHD2	0.0033134	1.72832	[1.72832494649894, 2.33207611376641]
21040371	DExD-box helicase 39A(DDX39A)	10212	DDX39A	0.0483382	1.04542	[1.04542014237475, 1.81282635292975]
21361458	Rho guanine nucleotide exchange factor 17(ARHGEF17)	9828	ARHGEF17	0.0466068	-1.21308	[-1.98044010724258, -1.21308164566618]
21361553	spleen associated tyrosine kinase(SYK)	6850	SYK	0.00172826	1.51891	[1.5189096911017, 2.12755344584845]
21361619	toll interacting protein(TOLLIP)	54472	TOLLIP	0.000705753	-1.38436	[-1.72012420310656, -1.38436233020053]
21361647	adenosylhomocysteinase like 1(AHCYL1)	10768	AHCYL1	0.0150006	-1.0776	[-1.67887678010899, -1.07759875083162]
21687127	coiled-coil domain containing 127(CCDC127)	133957	CCDC127	0.0254478	-1.40852	[-2.50859996573211, -1.40851989060987]
22202611	carboxypeptidase D(CPD)	1362	CPD	0.0328663	-1.07294	[-1.92437788348695, -1.07293726583255]
22202619	cathepsin L(CTSL)	1514	CTSL	0.0142384	1.28362	[1.2836156060595, 2.33718476166351]
22202624	glutathione S-transferase zeta 1(GSTZ1)	2954	GSTZ1	0.00678083	-1.53298	[-2.23754152552027, -1.53297763683638]
22219465	nudix hydrolase 2(NUDT2)	318	NUDT2	0.0317693	-1.31212	[-2.22639135363309, -1.31212262686908]
22547149	F-box protein 22(FBXO22)	26263	FBXO22	0.0456644	-0.928379	[-1.52502762870934, -0.928378833233543]
22748937	exportin 5(XPO5)	57510	XPO5	0.00928063	1.59034	[1.59033913900567, 2.31779751336868]
23065552	glutathione S-transferase mu 3(GSTM3)	2947	GSTM3	0.0384354	-3.46102	[-5.49482969825994, -3.46101502390012]
23110925	proteasome subunit beta 6(PSMB6)	5694	PSMB6	0.0209102	-1.17467	[-2.01075067045629, -1.17466541525463]
23111005	microfibrillar associated protein 4(MFAP4)	4239	MFAP4	0.0117141	-4.31199	[-6.27664612906958, -4.31199422468516]
23308577	phosphoglycerate dehydrogenase(PHGDH)	26227	PHGDH	0.00193777	4.49202	[4.49201874757491, 6.48502269926304]
23510448	minichromosome maintenance complex component 5(MCM5)	4174	MCM5	0.000636238	2.42382	[2.42381756718962, 3.1393253557886]
23510451	acylaminoacyl-peptide hydrolase(APEH)	327	APEH	0.00908427	-0.991899	[-1.41652235711974, -0.991899472734725]
23821023	interleukin 4 induced 1(IL4I1)	259307	IL4I1	0.0109795	1.6865	[1.68649957645103, 2.72134005048729]
24234699	keratin 19(KRT19)	3880	KRT19	0.012302	-3.62738	[-5.44858871260252, -3.62738333514479]
24307999	glycerol-3-phosphate dehydrogenase 1-like(GPD1L)	23171	GPD1L	0.0170388	-2.26125	[-3.51962167402714, -2.2612525785023]
24430139	RNA polymerase II associated protein 1(RPAP1)	26015	RPAP1	0.0199304	-1.66065	[-2.59638327878989, -1.66065275224803]
24475861	phosphohistidine phosphatase 1(PHPT1)	29085	PHPT1	0.000368456	-2.14575	[-2.83940207866558, -2.14574892959118]
24497618	ATPase family, AAA domain containing 2(ATAD2)	29028	ATAD2	0.0313156	1.77918	[1.7791755613136, 2.8471783169431]
24586663	adaptor protein, phosphotyrosine interacting with PH domain and leucine zipper 2(APPL2)	55198	APPL2	0.0345603	-1.08094	[-1.62844970157265, -1.08093982985459]
27262628	nuclear autoantigenic sperm protein(NASP)	4678	NASP	0.000480787	2.85635	[2.85634707283524, 3.71388690222411]
27477127	keratin 82(KRT82)	3888	KRT82	0.0241275	-3.46537	[-5.35586718751439, -3.46537112064739]
27597059	DnaJ heat shock protein family (Hsp40) member C9(DNAJC9)	23234	DNAJC9	0.0082162	1.26474	[1.2647360066179, 1.95028204978608]
27597073	epoxide hydrolase 2(EPHX2)	2053	EPHX2	0.0219501	-1.89995	[-2.98328501591527, -1.89995366382652]
27894378	chloride intracellular channel 6(CLIC6)	54102	CLIC6	0.0489952	-3.42871	[-6.1910315003989, -3.42871392702997]
28610147	interleukin 6 signal transducer(IL6ST)	3572	IL6ST	0.0272827	-1.82848	[-2.99975504032942, -1.82848133739594]
28827801	anterior gradient 3, protein disulphide isomerase family member(AGR3)	155465	AGR3	0.0030089	-4.54785	[-6.29485720893552, -4.54784706344094]
28866947	metallothionein 1F(MT1F)	4494	MT1F	0.0461627	2.53479	[2.53479444114402, 4.4335272534908]
29171702	pyrophosphatase (inorganic) 2(PPA2)	27068	PPA2	0.011866	-1.39885	[-2.00494974460189, -1.3988488139904]
29725609	epidermal growth factor receptor(EGFR)	1956	EGFR	0.0400038	1.5714	[1.57140235475946, 2.79664122186895]
29725611	protein phosphatase 2 phosphatase activator(PTPA)	5524	PTPA	0.00286777	-1.1052	[-1.41578721733433, -1.10520079714152]
29788785	tubulin beta class I(TUBB)	203068	TUBB	0.0103126	1.05887	[1.05886686722415, 1.58972044098606]
29826282	protein phosphatase, Mg2+/Mn2+ dependent 1G(PPM1G)	5496	PPM1G	0.00948523	1.07447	[1.07446916732694, 1.70140100275937]
29826291	cancer susceptibility candidate 4(CASC4)	113201	CASC4	0.0146797	-0.903514	[-1.26389107789898, -0.903513662098264]
31317305	M-phase phosphoprotein 10(MPHOSPH10)	10199	MPHOSPH10	0.0400196	1.0722	[1.07220128572649, 1.72706262372265]
31377634	guanylate binding protein 4(GBP4)	115361	GBP4	0.0278195	1.34236	[1.34236302798921, 2.36103173791607]
31377697	collagen beta(1-O)galactosyltransferase 1(COLGALT1)	79709	COLGALT1	0.00558527	1.35261	[1.35261154236104, 1.95512403697865]
31377798	rabaptin, RAB GTPase binding effector protein 1(RABEP1)	9135	RABEP1	0.000524192	-2.07882	[-2.63356216105774, -2.07882292327724]
31377841	family with sequence similarity 63 member A(FAM63A)	55793	FAM63A	0.0217179	-1.3023	[-2.17425010006769, -1.30230092743363]
31541964	argininosuccinate lyase(ASL)	435	ASL	0.0190516	-1.26127	[-1.94374299719443, -1.2612728758042]
31542509	ADP dependent glucokinase(ADPGK)	83440	ADPGK	0.00216204	1.30286	[1.30286425747386, 1.80509772839497]
31542713	mitochondrial amidoxime reducing component 2(MARC2)	54996	2021-03-02	0.00764893	-1.42034	[-2.04000733359571, -1.4203379907959]
31543106	basal cell adhesion molecule (Lutheran blood group)(BCAM)	4059	BCAM	0.00235552	-2.11829	[-2.90516903727503, -2.11829096042187]
31543806	thrombospondin 4(THBS4)	7060	THBS4	0.0292004	-3.02513	[-4.85514368254245, -3.02512712821649]
31657129	phosphoribosylformylglycinamidine synthase(PFAS)	5198	PFAS	0.0486403	-0.729408	[-1.09125698384296, -0.729407567121541]
31881687	replication factor C subunit 4(RFC4)	5984	RFC4	0.0270736	1.03503	[1.03503068365247, 1.74303074448008]
32307144	procollagen-lysine,2-oxoglutarate 5-dioxygenase 1(PLOD1)	5351	PLOD1	0.0277804	1.26768	[1.26768433633014, 2.0824040293206]
32528306	replication factor C subunit 1(RFC1)	5981	RFC1	0.0173619	0.954435	[0.954434821128496, 1.4292514875842]
33239451	proliferating cell nuclear antigen(PCNA)	5111	PCNA	4.9e-05	2.43757	[2.4375672231968, 2.95843514719125]
33356174	pinin, desmosome associated protein(PNN)	5411	PNN	0.0151253	0.73409	[0.734089996394253, 1.11258983939823]
33356547	minichromosome maintenance complex component 2(MCM2)	4171	MCM2	0.000271714	2.91373	[2.91372696482649, 3.67725545383383]
33413400	esterase D(ESD)	2098	ESD	0.0347037	-1.06505	[-1.5912217841592, -1.06504857914803]
33457311	magnesium dependent phosphatase 1(MDP1)	145553	MDP1	0.0337953	-0.857335	[-1.43563120400853, -0.857335434906493]
33469917	minichromosome maintenance complex component 4(MCM4)	4173	MCM4	0.001159	2.57219	[2.57218679307885, 3.45265237131937]
33469968	minichromosome maintenance complex component 7(MCM7)	4176	MCM7	0.00172826	2.50791	[2.50791395420941, 3.33483979554878]
33598950	podocalyxin like(PODXL)	5420	PODXL	0.0204983	2.08037	[2.08037233468159, 3.13589974467449]
33620716	RB binding protein 6, ubiquitin ligase(RBBP6)	5930	RBBP6	0.0145367	1.24668	[1.24668121070677, 1.85453719528571]
34452732	phosphatidylinositol-3,4,5-trisphosphate dependent Rac exchange factor 1(PREX1)	57580	PREX1	0.0224333	-1.48809	[-2.57469531127352, -1.48808769997231]
34577059	perilipin 2(PLIN2)	123	PLIN2	0.00659003	2.41671	[2.41670962188118, 3.68949951230837]
37620194	glucosamine-phosphate N-acetyltransferase 1(GNPNAT1)	64841	GNPNAT1	0.0336159	-1.51773	[-2.45500326436506, -1.51773322739123]
37693993	NME/NM23 nucleoside diphosphate kinase 3(NME3)	4832	NME3	0.00544725	-1.81871	[-2.68592112539957, -1.81871099179932]
38027923	COP9 signalosome subunit 5(COPS5)	10987	COPS5	0.0146374	-0.730326	[-0.987194908209127, -0.730326011422704]
38327634	DEAD-box helicase 18(DDX18)	8886	DDX18	0.001159	1.67157	[1.67156988024511, 2.37347144652383]
38373690	COP9 signalosome subunit 4(COPS4)	51138	COPS4	0.0234983	-0.745538	[-1.06450183302814, -0.745537939801397]
39930541	chromosome 9 open reading frame 142(C9orf142)	286257	C9orf142	0.0116437	-0.987536	[-1.53949962269421, -0.98753590017089]
40217843	cartilage oligomeric matrix protein(COMP)	1311	COMP	0.0121304	-3.0718	[-4.53375272479656, -3.07179699070573]
40254992	carbonyl reductase 4(CBR4)	84869	CBR4	0.00859218	-1.87164	[-2.64563682237063, -1.87163915742556]
40255005	plexin domain containing 2(PLXDC2)	84898	PLXDC2	0.0423773	-1.51049	[-2.47210567028537, -1.51049174520157]
40354195	keratin 18(KRT18)	3875	KRT18	0.00596738	-3.88142	[-5.74329440313325, -3.88142464666088]
41327764	aldo-keto reductase family 7 member A2(AKR7A2)	8574	AKR7A2	0.00089684	-1.84027	[-2.42382874330811, -1.84027023188929]
41393545	RAB5C, member RAS oncogene family(RAB5C)	5878	RAB5C	0.038754	-0.830481	[-1.25962496143213, -0.830480589170015]
41393561	leucine aminopeptidase 3(LAP3)	51056	LAP3	0.0326856	1.05381	[1.05381258735552, 1.82723225022098]
41582239	immunoglobulin superfamily containing leucine rich repeat(ISLR)	3671	ISLR	0.00162404	-2.05157	[-3.03167788360948, -2.05157448011847]
44890050	stathmin 1(STMN1)	3925	STMN1	0.00134953	2.74933	[2.74932957363807, 3.77470115509524]
44921615	exocyst complex component 8(EXOC8)	149371	EXOC8	0.0266662	-0.74725	[-1.07763705865539, -0.747250280580312]
45505151	nuclear factor I C(NFIC)	4782	NFIC	0.0235651	-0.920273	[-1.56052857380114, -0.920273393494552]
45935383	carbonic anhydrase 12(CA12)	771	CA12	0.0205431	-2.58936	[-4.08069940616578, -2.58935669147346]
46094058	3'-phosphoadenosine 5'-phosphosulfate synthase 1(PAPSS1)	9061	PAPSS1	0.0494271	0.845195	[0.845195272829049, 1.52445076860246]
46367787	poly(A) binding protein cytoplasmic 1(PABPC1)	26986	PABPC1	0.000790765	1.22856	[1.22856080493888, 1.60802983200801]
46852172	kinesin family member 13B(KIF13B)	23303	KIF13B	0.0102391	-1.73848	[-2.50915809738826, -1.73848221720824]
47419936	SRSF protein kinase 1(SRPK1)	6732	SRPK1	0.0227623	1.19557	[1.1955728001894, 1.73122916927835]
49169828	translocase of outer mitochondrial membrane 5(TOMM5)	401505	TOMM5	0.0456739	1.48932	[1.48931980176507, 2.62135753603037]
49574502	cytochrome b5 reductase 1(CYB5R1)	51706	CYB5R1	0.0159451	-1.46777	[-2.87301654705543, -1.46776755661748]
50400081	small ubiquitin-like modifier 4(SUMO4)	387082	SUMO4	0.00701019	1.52002	[1.52001530642686, 2.34014088316172]
50428938	arsA arsenite transporter, ATP-binding, homolog 1 (bacterial)(ASNA1)	439	ASNA1	0.0252163	-0.85063	[-1.25822716235158, -0.85063015439836]
50541948	guanosine monophosphate reductase 2(GMPR2)	51292	GMPR2	0.000411996	-1.7609	[-2.30673279718022, -1.7609017658752]
50658063	structural maintenance of chromosomes 4(SMC4)	10051	SMC4	0.00200668	1.91031	[1.91030760369902, 2.66368610719535]
50658084	branched chain amino acid transaminase 2(BCAT2)	587	BCAT2	0.00902611	-1.31311	[-1.82559901730471, -1.31311032757005]
50659095	DExD-box helicase 21(DDX21)	9188	DDX21	0.00198512	2.11244	[2.1124434986585, 2.89622491439903]
51702526	Wiskott-Aldrich syndrome like(WASL)	8976	WASL	0.00896312	-0.809008	[-1.19507257103253, -0.809008147418147]
54112121	splicing factor 3b subunit 3(SF3B3)	23450	SF3B3	0.0272432	0.656732	[0.656731955509918, 1.0530028768021]
54792069	small ubiquitin-like modifier 2(SUMO2)	6613	SUMO2	0.0174401	0.973652	[0.973651597464617, 1.65640934931938]
54792098	erb-b2 receptor tyrosine kinase 2(ERBB2)	2064	ERBB2	0.00388026	-1.42393	[-2.00000523564232, -1.42393231306274]
55770900	BRX1, biogenesis of ribosomes(BRIX1)	55299	BRIX1	0.0188479	1.25616	[1.25615976628039, 1.96071021500902]
55953087	GTP binding protein 4(GTPBP4)	23560	GTPBP4	0.00281549	1.9568	[1.95679788535077, 2.99866628702759]
55956788	nucleolin(NCL)	4691	NCL	0.00219296	1.63133	[1.63132502653265, 2.36952216242048]
55956921	heterogeneous nuclear ribonucleoprotein A/B(HNRNPAB)	3182	HNRNPAB	0.0085948	1.50171	[1.50170761382753, 2.18533458983255]
56181387	STIP1 homology and U-box containing protein 1(STUB1)	10273	STUB1	0.00510371	-1.24279	[-1.76104086396316, -1.24279237567735]
56243583	WD repeat domain 18(WDR18)	57418	WDR18	0.0172876	1.0344	[1.03440425676261, 1.57849956093299]
56847620	basic transcription factor 3 like 4(BTF3L4)	91408	BTF3L4	0.0419974	1.00779	[1.00778703674816, 1.66486393988476]
57222563	cytoskeleton associated protein 5(CKAP5)	9793	CKAP5	0.0464851	0.793358	[0.793357895980404, 1.23761406206524]
57527756	chromosome 1 open reading frame 27(C1orf27)	54953	C1orf27	0.0140246	-0.8549	[-1.31204176161439, -0.854899628739217]
59710109	translocase of inner mitochondrial membrane domain containing 1(TIMMDC1)	51300	TIMMDC1	0.00151163	1.75466	[1.75465988885236, 2.17400355364826]
61175222	placenta specific 9(PLAC9)	219348	PLAC9	0.0217888	-2.17155	[-3.15961518371894, -2.17154963228267]
61744483	solute carrier family 3 member 2(SLC3A2)	6520	SLC3A2	0.00125377	2.29224	[2.29223615050334, 3.33398395807089]
62198232	3-hydroxymethyl-3-methylglutaryl-CoA lyase(HMGCL)	3155	HMGCL	0.0374756	-1.29131	[-2.13292206731765, -1.29131141802593]
62241044	exocyst complex component 7(EXOC7)	23265	EXOC7	0.00225787	-0.933751	[-1.19600677859653, -0.933751470815354]
62420888	dipeptidyl peptidase 7(DPP7)	29952	DPP7	0.00504629	-2.10171	[-3.19614746908489, -2.1017054483874]
62739166	procollagen-lysine,2-oxoglutarate 5-dioxygenase 2(PLOD2)	5352	PLOD2	0.00653588	2.40431	[2.40430519816708, 3.56862860442947]
62751417	RAB, member of RAS oncogene family like 3(RABL3)	285282	RABL3	0.0333261	-1.05633	[-1.6695490123198, -1.05632930211837]
67782311	Ski2 like RNA helicase(SKIV2L)	6499	SKIV2L	0.00929043	-0.83332	[-1.07855417047838, -0.83332048078291]
68051721	neutral cholesterol ester hydrolase 1(NCEH1)	57552	NCEH1	0.0471517	1.08781	[1.08781349432167, 1.84306024361814]
69354671	ATP binding cassette subfamily F member 1(ABCF1)	23	ABCF1	0.0362011	0.712884	[0.712884049705743, 1.17894008682645]
70980549	programmed cell death 11(PDCD11)	22984	PDCD11	0.020168	0.981529	[0.981528922576585, 1.42642710189922]
71051598	vacuolar protein sorting 36 homolog(VPS36)	51028	VPS36	0.0128606	-0.998528	[-1.4584204738121, -0.998527669569995]
73747915	transporter 2, ATP binding cassette subfamily B member(TAP2)	6891	TAP2	0.00498022	2.07648	[2.07647999613149, 3.0707263434296]
73760415	syntaxin binding protein 1(STXBP1)	6812	STXBP1	0.00380862	-1.47467	[-2.11690898526429, -1.47467365240207]
74099697	heterogeneous nuclear ribonucleoprotein H2 (H')(HNRNPH2)	3188	HNRNPH2	0.00363467	-1.68596	[-2.22545911457798, -1.68596080451488]
84043963	eukaryotic translation initiation factor 5B(EIF5B)	9669	EIF5B	0.0317382	0.725436	[0.725435710663211, 1.16218845839672]
89276751	collagen type V alpha 1 chain(COL5A1)	1289	COL5A1	0.0240763	-1.88248	[-3.02882662689342, -1.88248392989067]
91718899	mitogen-activated protein kinase 3(MAPK3)	5595	MAPK3	0.0185866	-0.901849	[-1.39288642143452, -0.901848868707086]
94538320	hydroxyacylglutathione hydrolase(HAGH)	3029	HAGH	0.00759564	-1.43588	[-1.9608616527336, -1.43587702631665]
94721354	methylenetetrahydrofolate dehydrogenase (NADP+ dependent) 2, methenyltetrahydrofolate cyclohydrolase(MTHFD2)	10797	MTHFD2	0.0498143	1.39303	[1.39303017673138, 2.07432594165901]
103485496	charged multivesicular body protein 1A(CHMP1A)	5119	CHMP1A	0.0357621	1.0981	[1.09810130866211, 1.94957389675941]
108773782	ATP binding cassette subfamily E member 1(ABCE1)	6059	ABCE1	0.0430541	0.618313	[0.618312882367434, 0.904387257914612]
109148508	OTU deubiquitinase, ubiquitin aldehyde binding 1(OTUB1)	55611	OTUB1	0.0348685	-0.750189	[-1.07976905600596, -0.750188954788835]
109826351	melanophilin(MLPH)	79083	MLPH	0.00139443	-4.03022	[-5.6477721733837, -4.0302164722845]
109948283	pumilio RNA binding family member 3(PUM3)	9933	PUM3	0.00243772	1.73648	[1.73648304397086, 2.60925234897107]
110227601	Coenzyme A synthase(COASY)	80347	COASY	0.0100122	-1.07841	[-1.74692094513195, -1.07840815485915]
112789562	interferon gamma inducible protein 16(IFI16)	3428	IFI16	0.00880719	1.46677	[1.46677206908148, 2.12373272641741]
114520609	neural precursor cell expressed, developmentally down-regulated 4, E3 ubiquitin protein ligase(NEDD4)	4734	NEDD4	0.00683252	-1.69014	[-2.52559076693171, -1.69013675915391]
115430219	crystallin lambda 1(CRYL1)	51084	CRYL1	0.0474672	-0.901421	[-1.45364585515143, -0.901421003922944]
116256479	RWD domain containing 4(RWDD4)	201965	RWDD4	0.0493553	-0.845685	[-1.26830498079982, -0.845685174362257]
116812577	LUC7 like 2, pre-mRNA splicing factor(LUC7L2)	51631	LUC7L2	0.0420875	0.747512	[0.747511754452998, 1.28036780678233]
116812600	StAR related lipid transfer domain containing 10(STARD10)	10809	STARD10	0.00610864	-3.19746	[-4.59574279762379, -3.19746338859979]
116812608	tetratricopeptide repeat domain 38(TTC38)	55020	TTC38	0.0373441	-1.36039	[-2.12483031341724, -1.3603891981769]
116812630	short chain dehydrogenase/reductase family 39U member 1(SDR39U1)	56948	SDR39U1	0.0105522	-1.27046	[-1.88395601156463, -1.27046330175689]
117168248	3-hydroxyacyl-CoA dehydratase 3(HACD3)	51495	HACD3	0.0492651	-1.1586	[-2.0072530197869, -1.15859640031233]
118498359	ribosomal L1 domain containing 1(RSL1D1)	26156	RSL1D1	0.00765436	1.44238	[1.44238335064798, 2.11174481351372]
119360348	fucosidase, alpha-L- 1, tissue(FUCA1)	2517	FUCA1	0.0352699	-1.66002	[-2.59445996843477, -1.6600177920292]
119703746	electron transfer flavoprotein dehydrogenase(ETFDH)	2110	ETFDH	0.00746173	-1.15079	[-1.75356855821229, -1.15078728337018]
119943100	propionyl-CoA carboxylase beta subunit(PCCB)	5096	PCCB	0.03516	-0.924167	[-1.51165644342308, -0.92416710413089]
122939159	peptidyl arginine deiminase 2(PADI2)	11240	PADI2	0.0267037	2.29378	[2.29377776696639, 4.07956005876248]
131888135	target of myb1 like 2 membrane trafficking protein(TOM1L2)	146691	TOM1L2	0.0273031	-1.29805	[-1.92563315370054, -1.29805003031672]
134152708	arginine and glutamate rich 1(ARGLU1)	55082	ARGLU1	0.0097873	0.978996	[0.978996125079454, 1.522676933604]
140161500	ankyrin repeat and sterile alpha motif domain containing 1A(ANKS1A)	23294	ANKS1A	0.0344143	0.635579	[0.635579275110396, 0.958919204689452]
148491070	CTP synthase 1(CTPS1)	1503	CTPS1	7.93e-05	2.27715	[2.27714787659653, 2.92121141682629]
148539853	EPS8 like 1(EPS8L1)	54869	EPS8L1	0.0124052	-1.29781	[-1.91520064891362, -1.29781257976139]
148747209	NOP16 nucleolar protein(NOP16)	51491	NOP16	0.0291805	1.07011	[1.07010682453506, 1.79006544073145]
151101404	prothymosin, alpha(PTMA)	5757	PTMA	0.00724186	2.31706	[2.31705708379248, 3.72982246899553]
151108473	fission, mitochondrial 1(FIS1)	51024	FIS1	0.0165282	-1.14118	[-1.78126558652695, -1.14118427180221]
154354987	hook microtubule tethering protein 2(HOOK2)	29911	HOOK2	0.0354824	-0.941875	[-1.62598117095229, -0.941875344045339]
154937350	phytanoyl-CoA dioxygenase domain containing 1(PHYHD1)	254295	PHYHD1	0.00562649	-2.87049	[-4.06005084394413, -2.87049083413306]
156071459	solute carrier family 25 member 5(SLC25A5)	292	SLC25A5	0.024942	1.30449	[1.30448869572194, 2.01840058442462]
156104895	inositol polyphosphate-4-phosphatase type II B(INPP4B)	8821	INPP4B	0.0148447	-2.69583	[-3.84274582488807, -2.69582624922873]
156416028	aspartyl aminopeptidase(DNPEP)	23549	DNPEP	0.0113994	-1.23804	[-1.8775215355438, -1.23803769354556]
156564357	NAD(P)H quinone dehydrogenase 2(NQO2)	4835	NQO2	0.0293838	-1.94715	[-3.10791500439494, -1.94714533466552]
156564401	N-ethylmaleimide sensitive factor, vesicle fusing ATPase(NSF)	4905	NSF	0.0245857	-1.07025	[-1.62263042639011, -1.07025116782594]
156627571	sorbitol dehydrogenase(SORD)	6652	SORD	0.00659746	-1.72768	[-2.38832708903503, -1.72767659222723]
157168362	purine nucleoside phosphorylase(PNP)	4860	PNP	0.0147426	1.20133	[1.20133265841559, 1.9529059811128]
157384956	nucleotide binding protein like(NUBPL)	80224	NUBPL	0.00184701	-1.90954	[-2.50698810581936, -1.90953772272961]
157694492	MYB binding protein 1a(MYBBP1A)	10514	MYBBP1A	0.0214517	1.13974	[1.13973725778974, 1.78266959432563]
157738667	FYVE and coiled-coil domain containing 1(FYCO1)	79443	FYCO1	0.00274664	-1.36702	[-1.96352928499368, -1.36702111752905]
163644313	calcium and integrin binding 1(CIB1)	10519	CIB1	0.0346638	-2.01941	[-3.47289207402538, -2.01941331226622]
163965377	thiosulfate sulfurtransferase like domain containing 1(TSTD1)	100131187	TSTD1	0.00297666	-3.00316	[-3.99096728383472, -3.00315616232105]
166706903	guanylate binding protein 1(GBP1)	2633	GBP1	0.001159	3.49714	[3.49714481647675, 4.84108024643827]
166795287	fatty acid amide hydrolase(FAAH)	2166	FAAH	0.0134228	-1.85731	[-2.7329808412964, -1.85730917371357]
166795299	solute carrier family 2 member 1(SLC2A1)	6513	SLC2A1	0.00154911	5.16397	[5.16396781192014, 7.42608938885213]
167466198	intercellular adhesion molecule 1(ICAM1)	3383	ICAM1	0.00171329	2.06695	[2.06694650603871, 2.83072169584962]
167614506	lymphocyte cytosolic protein 1(LCP1)	3936	LCP1	0.0189615	2.02031	[2.02031106518947, 3.01279618665562]
169881252	general transcription factor IIi(GTF2I)	2969	GTF2I	0.0207088	0.973433	[0.973432671067948, 1.66024824172035]
183227678	Parkinsonism associated deglycase(PARK7)	11315	PARK7	0.0226369	-1.16161	[-1.78579923950263, -1.16161490461599]
186928847	UTP4, small subunit processome component(UTP4)	84916	UTP4	0.00679621	1.25207	[1.25207394610541, 1.78276490680439]
187960109	RNA binding motif protein 28(RBM28)	55131	RBM28	0.00589825	1.55381	[1.55380680985159, 2.31034643608029]
188219625	signal transducing adaptor molecule 2(STAM2)	10254	STAM2	0.0198552	-0.944115	[-1.41251735432654, -0.944115038632933]
188536080	4-aminobutyrate aminotransferase(ABAT)	18	ABAT	0.00359342	-3.37074	[-5.20494874558962, -3.37074483038084]
189083742	neutrophil cytosolic factor 2(NCF2)	4688	NCF2	0.0406887	1.42398	[1.42397777075724, 2.45099576456087]
189083844	cathepsin C(CTSC)	1075	CTSC	0.0159	1.41207	[1.41207092880901, 2.34910973808378]
189083849	aminolevulinate dehydratase(ALAD)	210	ALAD	0.0286909	-1.29878	[-1.97697383906054, -1.29878245805945]
189458817	transferrin receptor(TFRC)	7037	TFRC	0.00678083	2.06768	[2.06767547328073, 2.93944299659287]
189491675	family with sequence similarity 136 member A(FAM136A)	84908	FAM136A	0.0186185	1.54816	[1.54815943500425, 2.5662390954144]
189571677	NudC domain containing 1(NUDCD1)	84955	NUDCD1	0.002624	1.85051	[1.85051052407052, 2.71515119812579]
190014588	PC4 and SFRS1 interacting protein 1(PSIP1)	11168	PSIP1	0.0368576	1.41981	[1.41981382965897, 2.57342552466912]
194018472	serpin family A member 5(SERPINA5)	5104	SERPINA5	0.0234503	-2.12297	[-3.39464250633677, -2.12296872716715]
194306644	von Willebrand factor A domain containing 5A(VWA5A)	4013	VWA5A	0.0189195	-1.23984	[-1.93536893620114, -1.23983710730314]
195546902	SPT5 homolog, DSIF elongation factor subunit(SUPT5H)	6829	SUPT5H	0.0027282	1.21501	[1.21501073497078, 1.70177398706737]
207028748	N-myc downstream regulated 1(NDRG1)	10397	NDRG1	0.0392506	1.86074	[1.86073962095355, 3.17246023653667]
208973246	quinoid dihydropteridine reductase(QDPR)	5860	QDPR	0.0199313	-1.95755	[-3.31794836994844, -1.95755458435819]
209869993	phosphoribosylglycinamide formyltransferase, phosphoribosylglycinamide synthetase, phosphoribosylaminoimidazole synthetase(GART)	2618	GART	0.00146515	1.09158	[1.09157638922109, 1.40336820981205]
209969703	regulator of chromosome condensation 2(RCC2)	55920	RCC2	0.0134427	1.24022	[1.240215600124, 2.16700235598049]
209969812	KN motif and ankyrin repeat domains 2(KANK2)	25959	KANK2	0.013355	-1.79854	[-2.67545426146484, -1.79853648495047]
217330644	WD repeat domain 12(WDR12)	55759	WDR12	0.0253503	1.42107	[1.42107478820564, 2.20995081448376]
221136993	thioredoxin related transmembrane protein 2(TMX2)	51075	TMX2	0.0115146	1.58073	[1.58073098997801, 2.37922121820369]
221219026	pleckstrin homology like domain family B member 1(PHLDB1)	23187	PHLDB1	0.0464851	-1.04444	[-1.73254795148297, -1.04443931620939]
221316566	cysteine and histidine rich domain containing 1(CHORDC1)	26973	CHORDC1	0.0364623	1.00299	[1.00298650335981, 1.73027915101624]
222136641	NIMA related kinase 9(NEK9)	91754	NEK9	0.0157617	-0.857417	[-1.23967912728119, -0.857416988214693]
222352122	scavenger receptor cysteine rich family member with 5 domains(SSC5D)	284297	SSC5D	0.00204473	-2.60462	[-3.52879626065222, -2.60462082233957]
222537732	secernin 2(SCRN2)	90507	SCRN2	0.00736094	-1.40197	[-2.072416982739, -1.40197366964723]
224589127	transmembrane protein 33(TMEM33)	55161	TMEM33	0.0129256	1.20118	[1.20117828551506, 1.76511030771935]
224593278	DEAD-box helicase 27(DDX27)	55661	DDX27	0.0214737	0.992385	[0.992385326301059, 1.72248511307803]
226059133	prostaglandin reductase 1(PTGR1)	22949	PTGR1	0.0283326	-1.73328	[-2.6333697782557, -1.73327651453969]
226246680	prostaglandin reductase 2(PTGR2)	145482	PTGR2	0.00271314	-2.4049	[-3.30444811895318, -2.40490415521716]
226371737	phosphatidylinositol-5-phosphate 4-kinase type 2 gamma(PIP4K2C)	79837	PIP4K2C	0.0485355	-0.762789	[-1.3332431441209, -0.76278858716883]
227498137	UFM1 specific peptidase 2(UFSP2)	55325	UFSP2	0.0127358	-0.995066	[-1.65110103924444, -0.995066255822362]
237649009	N-acetyltransferase 1(NAT1)	9	NAT1	0.0287713	-4.39599	[-6.45889621407312, -4.39598864778927]
237649015	EBNA1 binding protein 2(EBNA1BP2)	10969	EBNA1BP2	0.0288312	1.28786	[1.28785635312943, 2.00605724857509]
239582767	slingshot protein phosphatase 3(SSH3)	54961	SSH3	0.00252799	-1.66696	[-2.28066464079321, -1.66696038610001]
255918077	versican(VCAN)	1462	VCAN	0.00242442	-5.39236	[-7.31624260184293, -5.39236399631162]
261862348	serine hydroxymethyltransferase 2(SHMT2)	6472	SHMT2	0.00297181	1.77413	[1.77412710833696, 2.49252608836194]
269847098	phospholysine phosphohistidine inorganic pyrophosphate phosphatase(LHPP)	64077	LHPP	0.0463074	-1.24437	[-2.15016236105119, -1.24437389145441]
270265906	TBC1 domain family member 17(TBC1D17)	79735	TBC1D17	0.0130174	-1.1788	[-1.81344194973864, -1.17880382881712]
285002251	aspartylglucosaminidase(AGA)	175	AGA	0.0435407	-1.79181	[-2.89593636672551, -1.79181256630633]
291575128	lactate dehydrogenase B(LDHB)	3945	LDHB	0.00279146	2.50912	[2.50911685264274, 3.32331864688111]
296010848	asparagine synthetase (glutamine-hydrolyzing)(ASNS)	440	ASNS	0.00500128	2.12227	[2.122274724471, 3.07073851972014]
301069322	asporin(ASPN)	54829	ASPN	0.0245381	-3.04399	[-5.40307705730105, -3.04398845888273]
304571975	dicarbonyl and L-xylulose reductase(DCXR)	51181	DCXR	0.0231088	-1.62426	[-2.77775532851616, -1.62426434474033]
307691182	family with sequence similarity 213 member B(FAM213B)	127281	FAM213B	0.00643918	-1.43514	[-2.2228884104379, -1.4351391472805]
312032403	aminoacylase 1(ACY1)	95	ACY1	0.00552997	-1.32582	[-1.9099616005829, -1.32581796849142]
313569768	ribosomal protein L17(RPL17)	6139	RPL17	0.0193739	0.97014	[0.970140345862827, 1.43762315013891]
315221152	ribosomal protein L11(RPL11)	6135	RPL11	0.00421342	0.989187	[0.989186880492376, 1.32876956637839]
316983124	ribosomal protein L36a(RPL36A)	6173	RPL36A	0.00751341	1.99118	[1.99117566028921, 2.82680397529441]
321400118	SYNJ2BP-COX16 readthrough(SYNJ2BP-COX16)	100529257	SYNJ2BP-COX16	0.00101378	-1.22242	[-1.65289032599786, -1.22242306156892]
323668300	selenocysteine lyase(SCLY)	51540	SCLY	0.0357608	-1.186	[-2.05053433796225, -1.18599940619558]
325197106	component of oligomeric golgi complex 3(COG3)	83548	COG3	0.0433157	-0.848755	[-1.33180042113487, -0.848754714968]
334724463	twinfilin actin binding protein 1(TWF1)	5756	TWF1	0.0285882	-1.05325	[-1.49955899871884, -1.05325184956901]
338968899	NAD(P)HX dehydratase(NAXD)	55739	NAXD	0.0447264	-0.864464	[-1.41035060676067, -0.864463862452502]
343168770	activated leukocyte cell adhesion molecule(ALCAM)	214	ALCAM	0.0220918	-3.41993	[-5.63047965302449, -3.4199270355443]
345498499	LPS responsive beige-like anchor protein(LRBA)	987	LRBA	0.00433536	-1.33508	[-2.00429294443202, -1.33508269304316]
354725902	RAB5B, member RAS oncogene family(RAB5B)	5869	RAB5B	0.00517739	-1.19557	[-1.65524266755166, -1.19556877257461]
359385723	small integral membrane protein 22(SMIM22)	440335	SMIM22	0.0122913	-2.26152	[-3.06363834842822, -2.26151992323245]
372466577	keratin 8(KRT8)	3856	KRT8	0.0101004	-3.34802	[-4.81751416516711, -3.34802288796377]
373938450	ELOVL fatty acid elongase 1(ELOVL1)	64834	ELOVL1	0.0326372	1.0696	[1.06960159889414, 1.82464244008701]
374532777	mannosidase alpha class 2C member 1(MAN2C1)	4123	MAN2C1	0.017015	-1.14344	[-1.74132808942922, -1.14344131016301]
386869302	nucleolar protein 10(NOL10)	79954	NOL10	0.0269406	1.04361	[1.04360548330608, 1.72733982511568]
392307009	protein tyrosine phosphatase, receptor type C(PTPRC)	5788	PTPRC	0.012187	1.66103	[1.66103312382679, 2.37365442087182]
394582093	minichromosome maintenance complex component 3(MCM3)	4172	MCM3	0.000160174	3.0522	[3.05220368754187, 3.81449770611123]
402794631	vacuolar protein sorting 72 homolog(VPS72)	6944	VPS72	0.0221967	1.28605	[1.286047283932, 1.98878063656428]
418203907	integrin subunit beta like 1(ITGBL1)	9358	ITGBL1	0.00952833	-2.7881	[-4.40417360205339, -2.78810405426611]
425876766	serpin family B member 6(SERPINB6)	5269	SERPINB6	0.00352439	-1.6721	[-2.3669144074962, -1.67210243699991]
431822408	heat shock protein 90 alpha family class B member 1(HSP90AB1)	3326	HSP90AB1	0.0054339	1.10576	[1.10575979757947, 1.55438505377441]
449083351	SEC16 homolog A, endoplasmic reticulum export factor(SEC16A)	9919	SEC16A	0.00953389	-1.13028	[-1.56741726731678, -1.13027638343206]
510025466	fucose-1-phosphate guanylyltransferase(FPGT)	8790	FPGT	0.0113146	-1.3026	[-1.91005503828528, -1.30260430430631]
525507384	acidic nuclear phosphoprotein 32 family member E(ANP32E)	81611	ANP32E	0.000103162	3.53853	[3.53853300721224, 4.59853723824964]
526118265	golgin A5(GOLGA5)	9950	GOLGA5	0.0300132	-0.900983	[-1.41517710918126, -0.900982845097094]
530361777	podocan(PODN)	127435	PODN	0.00152314	-2.42138	[-3.20777534606312, -2.4213806926408]
530363407	hydroxypyruvate isomerase (putative)(HYI)	81888	HYI	0.000598927	-2.11196	[-2.65766321459057, -2.11195561645224]
530366190	lamin B receptor(LBR)	3930	LBR	0.0286377	1.12961	[1.12960712811137, 1.91996522163888]
530372121	filamin B(FLNB)	2317	FLNB	0.0382901	-2.62767	[-4.53292798859694, -2.62767273046674]
530374581	integrin subunit beta 5(ITGB5)	3693	ITGB5	0.0226369	-1.38314	[-2.37436947694197, -1.38313594989638]
530383148	myosin VI(MYO6)	4646	MYO6	0.00402221	-4.10048	[-5.66598700095804, -4.10048356290002]
530384039	utrophin(UTRN)	7402	UTRN	0.0465186	-1.01561	[-1.63079988900108, -1.0156096618521]
530387549	ER lipid raft associated 2(ERLIN2)	11160	ERLIN2	0.019744	-1.72928	[-2.92085926290297, -1.7292808135119]
530387776	N-acylsphingosine amidohydrolase 1(ASAH1)	427	ASAH1	0.0011618	-2.4152	[-3.7487608548555, -2.41519545674145]
530392942	SEC23 interacting protein(SEC23IP)	11196	SEC23IP	0.0320638	-0.741409	[-1.1895271409574, -0.74140899382388]
530395177	ADP ribosylation factor interacting protein 2(ARFIP2)	23647	ARFIP2	0.00945529	-1.50717	[-2.24606960761544, -1.50716940104444]
530396948	VPS37C, ESCRT-I subunit(VPS37C)	55048	VPS37C	0.0136768	-1.4577	[-2.32961231256708, -1.45770367874789]
530402044	periostin(POSTN)	10631	POSTN	0.0446778	-3.004	[-6.04758426668589, -3.00399597635496]
530404961	CDC42 binding protein kinase beta(CDC42BPB)	9578	CDC42BPB	0.00115316	-1.07292	[-1.48106061652124, -1.07292220800969]
530411932	HID1 domain containing(HID1)	283987	HID1	0.00279602	-1.6142	[-2.2246126922334, -1.61420337585545]
530425259	paralemmin(PALM)	5064	PALM	0.00401988	-2.65454	[-3.68632338587707, -2.6545357874777]
559098432	RAB guanine nucleotide exchange factor 1(RABGEF1)	27342	RABGEF1	0.0399604	-0.810982	[-1.28725311416304, -0.810981752204252]
559098473	SH3 domain containing GRB2 like endophilin B2(SH3GLB2)	56904	SH3GLB2	0.011891	-1.00795	[-1.39481590745936, -1.00795256186321]
566006098	ADP ribosylation factor interacting protein 1(ARFIP1)	27236	ARFIP1	0.0118332	-0.899448	[-1.22898223492552, -0.899447683102569]
570359592	arginyltransferase 1(ATE1)	11101	ATE1	0.0125886	-1.19497	[-1.84788735943344, -1.19497444263777]
576583519	glyceraldehyde-3-phosphate dehydrogenase(GAPDH)	2597	GAPDH	0.00199099	1.64985	[1.6498546183885, 2.30715668160466]
578803009	lysine demethylase 3A(KDM3A)	55818	KDM3A	0.0167921	1.66795	[1.66794562734658, 2.77770568302838]
578811175	endoplasmic reticulum-golgi intermediate compartment 1(ERGIC1)	57222	ERGIC1	0.0111205	-2.11614	[-3.10964012227471, -2.11614005283211]
578812166	nucleoporin 153(NUP153)	9972	NUP153	0.0104929	1.07369	[1.07369185711404, 1.48413989264118]
578827419	thrombospondin type 1 domain containing 4(THSD4)	79875	THSD4	0.000695641	-4.03213	[-5.39429244236013, -4.03213117537226]
578837026	pescadillo ribosomal biogenesis factor 1(PES1)	23481	PES1	0.000810455	1.67073	[1.67072651812276, 2.29450994451299]
634743249	SPARC like 1(SPARCL1)	8404	SPARCL1	0.0155694	-1.03614	[-1.53377052175655, -1.03613992621756]
669033286	high mobility group box 3(HMGB3)	3149	HMGB3	0.00836207	2.20061	[2.20061195104551, 3.08359056728288]
686661109	SAP30 binding protein(SAP30BP)	29115	SAP30BP	0.0369397	0.98854	[0.98853981343023, 1.52107983111485]
737675122	MORC family CW-type zinc finger 2(MORC2)	22880	MORC2	0.0449395	1.01656	[1.016558437914, 1.73139632254922]
746817424	ribosomal protein L10(RPL10)	6134	RPL10	0.0264969	0.860683	[0.860682533301613, 1.25261182835552]
767910254	sterol O-acyltransferase 1(SOAT1)	6646	SOAT1	0.0493988	1.59725	[1.59725217779421, 2.67421893058157]
767915156	TIA1 cytotoxic granule associated RNA binding protein(TIA1)	7072	TIA1	0.000844155	1.66288	[1.66287837836096, 2.2185110565526]
767922903	protein tyrosine phosphatase, non-receptor type 23(PTPN23)	25930	PTPN23	0.0243226	-0.800159	[-1.17319721420202, -0.800159318881191]
767929051	cyclin G associated kinase(GAK)	2580	GAK	0.0206437	-0.686115	[-0.994573201531012, -0.686115059757197]
767939899	major histocompatibility complex, class I, B(HLA-B)	3106	HLA-B	0.0298687	1.89689	[1.89689050290968, 3.18778541171914]
767940561	TAP binding protein(TAPBP)	6892	TAPBP	0.00212375	2.63444	[2.63443554698432, 3.63259751603451]
767942600	methylenetetrahydrofolate dehydrogenase (NADP+ dependent) 1-like(MTHFD1L)	25902	MTHFD1L	0.00240813	2.25222	[2.25221554175822, 3.51800597362972]
767958755	tight junction protein 2(TJP2)	9414	TJP2	0.00671348	1.27922	[1.2792222095641, 2.09879488540961]
767962352	heat shock protein family A (Hsp70) member 12A(HSPA12A)	259217	HSPA12A	0.0217923	-1.37198	[-2.0924604875662, -1.37197896309685]
767966235	signal peptide, CUB domain and EGF like domain containing 2(SCUBE2)	57758	SCUBE2	0.00838598	-3.26361	[-5.28517483722601, -3.26360987668022]
767967421	DNA polymerase delta 3, accessory subunit(POLD3)	10714	POLD3	0.0120251	1.85581	[1.85580788650877, 2.78450892462212]
767968378	synaptotagmin like 2(SYTL2)	54843	SYTL2	0.0088894	-2.12984	[-3.00431526309571, -2.12983583947297]
767997645	structural maintenance of chromosomes flexible hinge domain containing 1(SMCHD1)	23347	SMCHD1	0.0365277	0.973337	[0.973337042898675, 1.59198438780242]
767997907	RNA guanine-7 methyltransferase(RNMT)	8731	RNMT	0.0476362	0.835133	[0.835132631339675, 1.42713999366803]
768025695	ubiquitin fusion degradation 1 like (yeast)(UFD1L)	7353	UFD1L	0.0300886	0.636772	[0.636772471393615, 1.05706211333783]
809281400	atlastin GTPase 2(ATL2)	64225	ATL2	0.00435025	1.60408	[1.60408442601122, 2.51359143101706]
817478488	N(alpha)-acetyltransferase 50, NatE catalytic subunit(NAA50)	80218	NAA50	0.0021271	1.27235	[1.27235191033897, 1.66387509159331]
970949442	heat shock protein family A (Hsp70) member 12B(HSPA12B)	116835	HSPA12B	0.0187391	-1.23713	[-1.69689581172823, -1.23712974190803]
995970143	U2 snRNP associated SURP domain containing(U2SURP)	23350	U2SURP	0.00837514	1.06791	[1.06791213598134, 1.58231045372691]
1002095800	DEAD-box helicase 5(DDX5)	1655	DDX5	0.00640528	1.31357	[1.31356987683779, 1.96378574911242]
1002341781	karyopherin subunit alpha 2(KPNA2)	3838	KPNA2	0.000433191	2.55127	[2.55127212702091, 3.33898099503428]
1003701591	fragile histidine triad(FHIT)	2272	FHIT	0.001851	-2.23001	[-3.07032703400049, -2.23001146905221]
1004170672	cyclin dependent kinase 1(CDK1)	983	CDK1	0.00157914	2.92132	[2.92132106295563, 3.91380701507974]
1005880651	integrin subunit beta 4(ITGB4)	3691	ITGB4	0.0407128	1.25013	[1.25012969415413, 2.10546049586606]
1009287629	ribosomal protein S19(RPS19)	6223	RPS19	0.0287557	0.720653	[0.7206533587594, 1.06075445846306]
1011750762	nudix hydrolase 5(NUDT5)	11164	NUDT5	0.00550504	1.38998	[1.38997535845879, 1.98027440987261]
1013404558	protein kinase cAMP-dependent type II regulatory subunit alpha(PRKAR2A)	5576	PRKAR2A	0.0296158	-0.8576	[-1.30468441283609, -0.85760014973223]
1016080631	basigin (Ok blood group)(BSG)	682	BSG	0.0326319	1.81032	[1.81031608042396, 3.14652188660363]
1017029493	glutathione synthetase(GSS)	2937	GSS	0.000693261	-1.87009	[-2.33485381106366, -1.87008734165951]
1018191636	superoxide dismutase 2, mitochondrial(SOD2)	6648	SOD2	0.0445106	1.94495	[1.94495383485658, 3.07193191351773]
1034555654	cellular retinoic acid binding protein 2(CRABP2)	1382	CRABP2	0.0370799	-2.373	[-3.99711890418167, -2.37300368503125]
1034559866	penta-EF-hand domain containing 1(PEF1)	553115	PEF1	0.00273066	-1.41177	[-1.86096200199086, -1.41177431755121]
1034560222	G protein subunit gamma 12(GNG12)	55970	GNG12	0.0167506	-1.8128	[-2.6396790336629, -1.81280355915705]
1034560908	S100 calcium binding protein A13(S100A13)	6284	S100A13	0.0271273	-1.65383	[-2.77442424248582, -1.65382612187044]
1034567732	GDP dissociation inhibitor 2(GDI2)	2665	GDI2	0.0485994	0.76223	[0.762230025751907, 1.32294811971759]
1034568775	protein kinase, cGMP-dependent, type I(PRKG1)	5592	PRKG1	0.0233453	-1.44478	[-2.1314239615767, -1.44478498167286]
1034571673	tripartite motif containing 3(TRIM3)	10612	TRIM3	0.00294309	-1.77373	[-2.48108211802963, -1.7737277261495]
1034572967	triokinase and FMN cyclase(TKFC)	26007	TKFC	0.00615329	-1.86007	[-2.56663117943654, -1.86007435948026]
1034573886	nucleobindin 2(NUCB2)	4925	NUCB2	0.01671	-2.13513	[-3.22433899572338, -2.13512862274218]
1034575326	AHNAK nucleoprotein(AHNAK)	79026	AHNAK	0.0083214	-1.77561	[-2.55102906966359, -1.77560732007548]
1034575756	fermitin family member 3(FERMT3)	83706	FERMT3	0.0379392	1.12917	[1.12917173431005, 1.77867151108466]
1034576106	embryonic ectoderm development(EED)	8726	EED	0.00708916	1.30548	[1.30547552352816, 1.91143693604326]
1034586629	fucosyltransferase 8(FUT8)	2530	FUT8	0.00246093	-1.67871	[-2.35785547608659, -1.6787067167369]
1034586919	forkhead box A1(FOXA1)	3169	FOXA1	0.021924	-1.72527	[-2.90416619628301, -1.72527075893908]
1034587017	kinectin 1(KTN1)	3895	KTN1	0.0124292	-1.21753	[-1.87342719078529, -1.21753256922883]
1034588086	tryptophanyl-tRNA synthetase(WARS)	7453	WARS	0.00534902	2.09286	[2.09285839130011, 3.16579093661692]
1034590514	isovaleryl-CoA dehydrogenase(IVD)	3712	IVD	0.00513794	-2.25761	[-3.24152279459365, -2.25760914664603]
1034591771	ubiquitin protein ligase E3A(UBE3A)	7337	UBE3A	0.0398899	-0.809595	[-1.18730285533066, -0.809594555456741]
1034598533	adaptor related protein complex 2 beta 1 subunit(AP2B1)	163	AP2B1	0.0209893	-0.772463	[-1.16525996432716, -0.772463007759011]
1034601610	phosphatidylinositol-5-phosphate 4-kinase type 2 beta(PIP4K2B)	8396	PIP4K2B	0.0340258	-0.868218	[-1.26140085831728, -0.868217813191172]
1034604114	NPC intracellular cholesterol transporter 1(NPC1)	4864	NPC1	0.00261356	1.55187	[1.55187350695846, 2.2686184827929]
1034604510	RAB27B, member RAS oncogene family(RAB27B)	5874	RAB27B	0.00194856	-4.2373	[-5.92549277100694, -4.23730112642236]
1034604883	haloacid dehalogenase like hydrolase domain containing 2(HDHD2)	84064	HDHD2	0.0141957	-1.29906	[-1.95967920029853, -1.29906328382369]
1034607693	protein arginine methyltransferase 1(PRMT1)	3276	PRMT1	0.0418394	1.14546	[1.14546044971598, 1.94154643296773]
1034617216	plakophilin 4(PKP4)	8502	PKP4	0.00722054	-1.2715	[-1.77892731915711, -1.27149886286062]
1034624541	RALY heterogeneous nuclear ribonucleoprotein(RALY)	22913	RALY	0.00599584	1.05064	[1.05064211775022, 1.57018941797427]
1034627478	intersectin 1(ITSN1)	6453	ITSN1	0.0293838	-1.09105	[-1.7598987546786, -1.09105496358043]
1034629275	Ran GTPase activating protein 1(RANGAP1)	5905	RANGAP1	0.0159226	0.658703	[0.65870278103796, 0.924425961723659]
1034631559	discs large MAGUK scaffold protein 1(DLG1)	1739	DLG1	0.00493768	-1.0576	[-1.46198774241838, -1.05760050348358]
1034633975	leucine zipper transcription factor like 1(LZTFL1)	54585	LZTFL1	0.00637418	-1.40615	[-2.02033489929131, -1.406153111825]
1034634976	3-hydroxybutyrate dehydrogenase, type 1(BDH1)	622	BDH1	0.035236	-1.91092	[-3.0348936214715, -1.9109226989293]
1034636253	guanine monophosphate synthase(GMPS)	8833	GMPS	0.0024429	1.5552	[1.55519588202145, 2.21851626045105]
1034641303	SET domain containing lysine methyltransferase 7(SETD7)	80854	SETD7	0.0336153	-1.29509	[-1.99689589217132, -1.29509471932351]
1034643585	carboxymethylenebutenolidase homolog(CMBL)	134147	CMBL	0.000480787	-3.68492	[-4.84824257200546, -3.68491838599636]
1034644781	heterogeneous nuclear ribonucleoprotein H1 (H)(HNRNPH1)	3187	HNRNPH1	0.0405326	1.23984	[1.239839262665, 1.83601786665704]
1034645180	COMM domain containing 10(COMMD10)	51397	COMMD10	0.0172058	-1.20568	[-1.72813970383356, -1.20568145604925]
1034648154	enoyl-CoA delta isomerase 2(ECI2)	10455	ECI2	0.0425411	-1.71	[-2.9250768479788, -1.71000018982535]
1034649985	ribosomal protein L7 like 1(RPL7L1)	285855	RPL7L1	0.032438	0.989492	[0.989491835333076, 1.51988580345179]
1034652357	A-kinase anchoring protein 12(AKAP12)	9590	AKAP12	0.00645598	-2.51828	[-3.51243802253351, -2.51828148423553]
1034655320	islet cell autoantigen 1(ICA1)	3382	ICA1	0.0438651	-1.18189	[-2.17838361276902, -1.18189305465051]
1034657353	bromodomain adjacent to zinc finger domain 1B(BAZ1B)	9031	BAZ1B	0.0253503	1.16045	[1.16045005035253, 1.79711629670262]
1034660334	aspartate beta-hydroxylase(ASPH)	444	ASPH	0.0490291	-1.1079	[-1.82314599019414, -1.10789847616648]
1034661444	collagen type XIV alpha 1 chain(COL14A1)	7373	COL14A1	0.0248453	-2.45598	[-3.83177345072235, -2.45597635669275]
1034663579	structural maintenance of chromosomes 2(SMC2)	10592	SMC2	9.25e-05	2.22254	[2.22253974306762, 2.86771897538426]
1034664115	dynamin 1(DNM1)	1759	DNM1	0.00483184	-1.89101	[-2.66490038737151, -1.89100616864739]
1034664266	adenylate kinase 1(AK1)	203	AK1	0.0383886	-1.24499	[-1.88010495525833, -1.24498924932663]
1034665350	nuclear factor I B(NFIB)	4781	NFIB	0.00809713	2.69735	[2.69734798454341, 4.32827229305893]
1034675377	LAS1 like, ribosome biogenesis factor(LAS1L)	81887	LAS1L	0.039834	0.849114	[0.849113505711662, 1.20648846949888]

## Sheet: TN vs. LB1
Consensus Significantly Differentially Expressed Proteins for TN vs. LB1
Protein Accession	Definition	geneID	Gene Symbol	adj.P_representative	log2FC_representative (TN/LB1)	log2FC (range)
4501859	acyl-CoA dehydrogenase, short/branched chain(ACADSB)	36	ACADSB	0.00746139	-2.99714	[-3.95942803614845, -2.99713984989025]
4502281	ATPase Na+/K+ transporting subunit beta 3(ATP1B3)	483	ATP1B3	0.0351533	1.33446	[1.33445598117698, 2.06574259677579]
4502551	calumenin(CALU)	813	CALU	0.0461352	1.34883	[1.34883098338503, 2.11345238207876]
4502847	cold inducible RNA binding protein(CIRBP)	1153	CIRBP	0.0169631	-1.88012	[-2.6904992684837, -1.88011635352772]
4503047	cysteine rich protein 1(CRIP1)	1396	CRIP1	0.00434451	-3.91079	[-5.43346059755239, -3.91079382450419]
4503249	DEK proto-oncogene(DEK)	7913	DEK	0.0146232	1.28655	[1.2865483615052, 1.91834838821361]
4503481	eukaryotic translation elongation factor 1 gamma(EEF1G)	1937	EEF1G	0.037246	0.927818	[0.927817882953993, 1.50778387301927]
4503549	elastase, neutrophil expressed(ELANE)	1991	ELANE	0.00127515	3.41905	[3.4190512780499, 4.73245093579576]
4503571	enolase 1(ENO1)	2023	ENO1	0.00284706	2.25373	[2.25373495783304, 3.06515718332339]
4503909	guanidinoacetate N-methyltransferase(GAMT)	2593	GAMT	0.000505619	-2.46572	[-3.22793741296984, -2.46571692105093]
4504183	glutathione S-transferase pi 1(GSTP1)	2950	GSTP1	0.0310881	2.35758	[2.35757513081502, 3.33865988141137]
4504191	mutS homolog 6(MSH6)	2956	MSH6	0.00352493	1.38514	[1.38513708327211, 2.08908810165785]
4504279	H3 histone family member 3A(H3F3A)	3020	H3F3A	0.0464184	-1.39322	[-2.02688433872982, -1.39322161189743]
4504341	histone acetyltransferase 1(HAT1)	8520	HAT1	0.0178919	1.23263	[1.2326338169383, 2.07390324877372]
4505343	nuclear cap binding protein subunit 1(NCBP1)	4686	NCBP1	0.00630237	1.00688	[1.0068831400151, 1.61928904072272]
4505621	phosphatidylethanolamine binding protein 1(PEBP1)	5037	PEBP1	0.0257719	-1.58573	[-2.20534244281088, -1.5857340290479]
4505785	phosphorylase kinase catalytic subunit gamma 2(PHKG2)	5261	PHKG2	0.0494276	-0.97087	[-1.44921396327617, -0.970869587781061]
4505891	procollagen-lysine,2-oxoglutarate 5-dioxygenase 3(PLOD3)	8985	PLOD3	0.00179156	1.5877	[1.58770332915381, 1.96259349697317]
4506773	S100 calcium binding protein A9(S100A9)	6280	S100A9	0.0166955	4.65218	[4.6521805256881, 6.66717386593152]
4507115	fascin actin-bundling protein 1(FSCN1)	6624	FSCN1	7.41e-05	3.29849	[3.29848517707296, 4.30627849947397]
4507149	superoxide dismutase 1, soluble(SOD1)	6647	SOD1	0.0255933	-1.59552	[-2.32299523858179, -1.59552168724637]
4507185	sepiapterin reductase (7,8-dihydrobiopterin:NADP+ oxidoreductase)(SPR)	6697	SPR	0.00777194	-2.54196	[-3.26317395086647, -2.54195518491731]
4507801	small ubiquitin-like modifier 1(SUMO1)	7341	SUMO1	0.0422275	1.04914	[1.0491376214721, 1.61547420283314]
4507875	vascular cell adhesion molecule 1(VCAM1)	7412	VCAM1	0.0299103	1.77802	[1.77801704956431, 2.67970453312445]
4507947	tyrosyl-tRNA synthetase(YARS)	8565	YARS	0.00704625	1.07459	[1.07459282208003, 1.46769488183834]
4557471	adaptor related protein complex 1 sigma 1 subunit(AP1S1)	1174	AP1S1	0.00699627	-1.33848	[-1.93605326722028, -1.33848046554104]
4557759	myeloperoxidase(MPO)	4353	MPO	0.000286122	3.74187	[3.74187117365965, 4.94620805362825]
4557761	mutS homolog 2(MSH2)	4436	MSH2	0.0105462	0.979489	[0.979488574981934, 1.56704333106095]
4557831	pterin-4 alpha-carbinolamine dehydratase 1(PCBD1)	5092	PCBD1	0.0219946	-2.27745	[-3.10602284513572, -2.27744839380326]
4757902	centrin 2(CETN2)	1069	CETN2	0.0417342	-1.15158	[-1.62009584710426, -1.15157827486116]
4758442	glia maturation factor beta(GMFB)	2764	GMFB	0.0294028	-0.994636	[-1.49567623954396, -0.99463626195828]
4885281	glutamate dehydrogenase 1(GLUD1)	2746	GLUD1	0.0145799	-1.9361	[-2.56388757662451, -1.93609633217494]
4885373	histone cluster 1 H1 family member a(HIST1H1A)	3024	HIST1H1A	5.43e-07	6.6435	[6.64350201275271, 7.96416445968724]
5174447	receptor for activated C kinase 1(RACK1)	10399	RACK1	0.0251488	0.752166	[0.752165756566421, 1.19809176905104]
5454088	acidic nuclear phosphoprotein 32 family member B(ANP32B)	10541	ANP32B	0.0207966	1.40528	[1.40528276806974, 2.03495227791262]
5454090	signal sequence receptor subunit 4(SSR4)	6748	SSR4	0.0401263	1.63863	[1.63863010657472, 2.71723635729323]
5729770	tripeptidyl peptidase 1(TPP1)	1200	TPP1	0.0488705	-0.947184	[-1.35556366348959, -0.947183731500218]
5802974	peroxiredoxin 3(PRDX3)	10935	PRDX3	0.0252198	-1.78711	[-2.67093190984014, -1.78710924509826]
5802976	adipogenesis regulatory factor(ADIRF)	10974	ADIRF	0.0336721	-4.2027	[-6.18735488793328, -4.20269842124214]
5901948	Fas associated factor 1(FAF1)	11124	FAF1	0.0423129	0.746184	[0.746184080819601, 1.11381607221239]
6005757	SPT16 homolog, facilitates chromatin remodeling subunit(SUPT16H)	11198	SUPT16H	0.0402862	0.966118	[0.966117502692279, 1.52724810930664]
6912356	echinoderm microtubule associated protein like 2(EML2)	24139	EML2	0.00679365	-2.3519	[-3.2418277409789, -2.35189974626344]
6912586	6-phosphogluconolactonase(PGLS)	25796	PGLS	0.0203347	-0.881487	[-1.31392396772634, -0.881486748614733]
6912708	translocase of inner mitochondrial membrane 10(TIMM10)	26519	TIMM10	0.0259442	-1.28562	[-1.81530175660691, -1.28561777089948]
7427519	minichromosome maintenance complex component 6(MCM6)	4175	MCM6	0.00819606	2.42983	[2.42983348466092, 3.69698192020036]
7657033	5', 3'-nucleotidase, cytosolic(NT5C)	30833	NT5C	0.0439223	-0.9337	[-1.33651346490435, -0.933700243149687]
7661920	eukaryotic translation initiation factor 4A3(EIF4A3)	9775	EIF4A3	0.0259536	0.720802	[0.720802101736895, 1.09248883485758]
7705437	NIP7, nucleolar pre-rRNA processing protein(NIP7)	51388	NIP7	0.0324402	1.19241	[1.19240553935258, 1.76004430997618]
7705696	thioredoxin domain containing 12(TXNDC12)	51060	TXNDC12	0.00751784	1.31225	[1.31225263280385, 1.84898428901922]
7705855	hydroxysteroid 17-beta dehydrogenase 12(HSD17B12)	51144	HSD17B12	0.0479627	1.38878	[1.38877592002056, 2.15405681122256]
7705927	ATPase inhibitory factor 1(ATPIF1)	93974	ATPIF1	0.0357542	-1.7839	[-2.77801636335801, -1.78390423404803]
9994185	RNA binding motif protein 7(RBM7)	10179	RBM7	0.0381904	0.977603	[0.977603109467638, 1.59976385989018]
10337595	protein phosphatase, Mg2+/Mn2+ dependent 1A(PPM1A)	5494	PPM1A	0.00759679	-0.989668	[-1.38979062576177, -0.989667816717711]
11095441	aldehyde dehydrogenase 6 family member A1(ALDH6A1)	4329	ALDH6A1	0.00399583	-2.29569	[-3.00021401033349, -2.29568612783228]
11321601	phosphofructokinase, platelet(PFKP)	5214	PFKP	0.00459379	2.70454	[2.70453751948735, 3.54013515666223]
11415040	suppression of tumorigenicity 14(ST14)	6768	ST14	0.029324	1.10397	[1.10396681675499, 1.67374443413377]
13375746	acidic residue methyltransferase 1(ARMT1)	79624	ARMT1	0.0238404	-3.0568	[-4.09476446936201, -3.05679753775492]
14141195	stromal cell derived factor 2(SDF2)	6388	SDF2	0.0380594	1.46235	[1.46234552257885, 2.66273462540743]
14150134	coiled-coil-helix-coiled-coil-helix domain containing 6(CHCHD6)	84303	CHCHD6	0.0498299	-1.22556	[-1.823947896759, -1.22556185554726]
14249382	abhydrolase domain containing 14B(ABHD14B)	84836	ABHD14B	0.0246863	-1.8134	[-2.49515228011216, -1.81339817985704]
14249478	chromosome 1 open reading frame 198(C1orf198)	84886	C1orf198	0.0205478	1.78688	[1.78688258202982, 2.57356675380667]
15277342	hydroxysteroid 17-beta dehydrogenase 8(HSD17B8)	7923	HSD17B8	0.0472296	-1.16806	[-1.74170877558547, -1.16806493859552]
15553127	hexokinase 2(HK2)	3099	HK2	0.0302752	1.49764	[1.49763866435723, 2.29303015703943]
16554627	WD repeat domain 5(WDR5)	11091	WDR5	0.0372554	0.700069	[0.70006855912567, 1.08527834478867]
16579888	fructose-bisphosphatase 1(FBP1)	2203	FBP1	0.0138241	-2.49414	[-3.52576511470154, -2.49413855102003]
18426915	drebrin 1(DBN1)	1627	DBN1	0.0459954	1.40689	[1.40688643294347, 2.29316696736222]
19923919	receptor accessory protein 6(REEP6)	92840	REEP6	0.0148877	-3.95701	[-5.28332115969363, -3.95701074072682]
20127454	5-aminoimidazole-4-carboxamide ribonucleotide formyltransferase/IMP cyclohydrolase(ATIC)	471	ATIC	0.0295692	-1.15991	[-1.8416459930864, -1.15990885305165]
21361091	ubiquitin C-terminal hydrolase L1(UCHL1)	7345	UCHL1	0.0224504	3.30473	[3.30472635064312, 5.15316075866978]
21361399	protein phosphatase 2 scaffold subunit Aalpha(PPP2R1A)	5518	PPP2R1A	0.0361383	-0.665185	[-1.00140780831021, -0.665185260444076]
21361647	adenosylhomocysteinase like 1(AHCYL1)	10768	AHCYL1	0.0178859	-1.13875	[-1.60632310027271, -1.13875187492599]
21614544	S100 calcium binding protein A8(S100A8)	6279	S100A8	0.0226583	4.55691	[4.55690518903664, 6.87399871969563]
22219465	nudix hydrolase 2(NUDT2)	318	NUDT2	0.026335	-1.22316	[-1.95742212027919, -1.22315700881221]
22748937	exportin 5(XPO5)	57510	XPO5	0.0245187	1.39229	[1.3922926550773, 2.13642159407911]
22907028	fructose-bisphosphatase 2(FBP2)	8789	FBP2	0.00987414	-3.24423	[-4.55163932545633, -3.24423440465025]
23308577	phosphoglycerate dehydrogenase(PHGDH)	26227	PHGDH	0.000578376	4.57932	[4.57932455764868, 6.29362566475756]
23510448	minichromosome maintenance complex component 5(MCM5)	4174	MCM5	0.00743126	1.97608	[1.97608156862319, 2.92868058611014]
23510451	acylaminoacyl-peptide hydrolase(APEH)	327	APEH	0.0251553	-1.06849	[-1.42856184619442, -1.06849429026297]
23957690	component of oligomeric golgi complex 7(COG7)	91949	COG7	0.0409601	-1.10718	[-1.50432693729206, -1.10717572089414]
24307999	glycerol-3-phosphate dehydrogenase 1-like(GPD1L)	23171	GPD1L	0.0293541	-2.53922	[-3.75326247609632, -2.5392188654115]
24475861	phosphohistidine phosphatase 1(PHPT1)	29085	PHPT1	0.00780289	-1.5314	[-2.14974347431938, -1.53140061066048]
27262628	nuclear autoantigenic sperm protein(NASP)	4678	NASP	2.66e-05	2.49146	[2.49146289029782, 3.35327965836688]
28827801	anterior gradient 3, protein disulphide isomerase family member(AGR3)	155465	AGR3	0.00889683	-4.7548	[-6.72244206319005, -4.75480457916482]
28866947	metallothionein 1F(MT1F)	4494	MT1F	0.0212662	4.06807	[4.06806574208969, 5.96825207923179]
29171702	pyrophosphatase (inorganic) 2(PPA2)	27068	PPA2	0.0160143	-1.38947	[-2.00880268462579, -1.3894681653655]
29725609	epidermal growth factor receptor(EGFR)	1956	EGFR	0.00103523	3.54236	[3.54235569998637, 4.44888957522801]
31377697	collagen beta(1-O)galactosyltransferase 1(COLGALT1)	79709	COLGALT1	0.00444542	1.59158	[1.59157762482105, 2.09211298266028]
31377798	rabaptin, RAB GTPase binding effector protein 1(RABEP1)	9135	RABEP1	0.00701847	-2.01082	[-2.59836363375875, -2.01082082425127]
31543106	basal cell adhesion molecule (Lutheran blood group)(BCAM)	4059	BCAM	0.0429159	-1.99023	[-3.04009057137923, -1.99022548796385]
32307144	procollagen-lysine,2-oxoglutarate 5-dioxygenase 1(PLOD1)	5351	PLOD1	0.00723094	1.80321	[1.80320983955743, 2.51842239966814]
33356547	minichromosome maintenance complex component 2(MCM2)	4171	MCM2	0.00390523	2.3178	[2.31779767876548, 3.31038563197583]
33359694	ubiquitin conjugating enzyme E2 E3(UBE2E3)	10477	UBE2E3	0.00352842	2.94026	[2.94025969493391, 3.86611193954525]
33457311	magnesium dependent phosphatase 1(MDP1)	145553	MDP1	0.0433263	-0.825378	[-1.28140635884778, -0.825377551022205]
33469917	minichromosome maintenance complex component 4(MCM4)	4173	MCM4	0.0207135	1.88814	[1.88813946042656, 3.08618322990086]
33469968	minichromosome maintenance complex component 7(MCM7)	4176	MCM7	0.00895126	1.94068	[1.94068441388994, 3.02308779000989]
33598950	podocalyxin like(PODXL)	5420	PODXL	0.000273009	3.49469	[3.49468986463663, 4.35351624860994]
34452732	phosphatidylinositol-3,4,5-trisphosphate dependent Rac exchange factor 1(PREX1)	57580	PREX1	0.048131	-1.38579	[-2.0909470703335, -1.38578977852546]
37693993	NME/NM23 nucleoside diphosphate kinase 3(NME3)	4832	NME3	0.00310907	-2.04725	[-2.65783194060848, -2.04724676007766]
38327634	DEAD-box helicase 18(DDX18)	8886	DDX18	0.000324883	1.5446	[1.54460021778901, 2.06528563414155]
39930541	chromosome 9 open reading frame 142(C9orf142)	286257	C9orf142	0.0227877	-1.09797	[-1.50057704867338, -1.09797112147802]
40254992	carbonyl reductase 4(CBR4)	84869	CBR4	0.004418	-1.76204	[-2.25853197889245, -1.76204490244741]
40354195	keratin 18(KRT18)	3875	KRT18	0.0255072	-3.59064	[-5.4850421636814, -3.59063936244197]
41327764	aldo-keto reductase family 7 member A2(AKR7A2)	8574	AKR7A2	0.0100213	-1.75479	[-2.29713793716272, -1.75479262196061]
44890050	stathmin 1(STMN1)	3925	STMN1	0.018626	1.91174	[1.91173684001674, 2.99726067057917]
45935383	carbonic anhydrase 12(CA12)	771	CA12	0.00929813	-2.88552	[-4.15399894441613, -2.88552429074192]
46094058	3'-phosphoadenosine 5'-phosphosulfate synthase 1(PAPSS1)	9061	PAPSS1	0.026802	1.08986	[1.08986228661474, 1.72986743447629]
46852147	isoleucyl-tRNA synthetase 2, mitochondrial(IARS2)	55699	IARS2	0.0339108	-1.14177	[-1.59454859370101, -1.14176595987737]
47155554	aminopeptidase-like 1(NPEPL1)	79716	NPEPL1	0.04064	-1.35948	[-1.97583615184491, -1.35947566146866]
47419936	SRSF protein kinase 1(SRPK1)	6732	SRPK1	0.0218853	1.17481	[1.17481198102729, 1.67037953463079]
49574502	cytochrome b5 reductase 1(CYB5R1)	51706	CYB5R1	0.0065026	-2.21387	[-3.30593806001625, -2.2138684537894]
50428938	arsA arsenite transporter, ATP-binding, homolog 1 (bacterial)(ASNA1)	439	ASNA1	0.0168516	-0.885611	[-1.21902807784109, -0.88561081222728]
50541948	guanosine monophosphate reductase 2(GMPR2)	51292	GMPR2	0.0122429	-1.2899	[-1.93169515533536, -1.28990068335828]
50658063	structural maintenance of chromosomes 4(SMC4)	10051	SMC4	0.0018989	1.66114	[1.6611384828158, 2.26483611258725]
50658084	branched chain amino acid transaminase 2(BCAT2)	587	BCAT2	0.0141309	-1.6269	[-2.24519805667286, -1.62690050156096]
54859722	nucleoporin 160(NUP160)	23279	NUP160	0.0332476	0.599383	[0.599383395956201, 0.98681283932049]
55770836	saccharopine dehydrogenase (putative)(SCCPDH)	51097	SCCPDH	0.0142787	-1.96589	[-2.72743763333897, -1.9658918287451]
56117838	secreted frizzled related protein 1(SFRP1)	6422	SFRP1	0.00100964	4.32763	[4.32763195014873, 5.89924322206454]
56181387	STIP1 homology and U-box containing protein 1(STUB1)	10273	STUB1	0.00987763	-1.57834	[-2.03528288428678, -1.57834401946784]
61743969	SEH1 like nucleoporin(SEH1L)	81929	SEH1L	0.0218372	0.634376	[0.634375647057973, 0.857585018289666]
61744483	solute carrier family 3 member 2(SLC3A2)	6520	SLC3A2	0.00673458	1.87619	[1.87619349009325, 2.77326013447525]
62198232	3-hydroxymethyl-3-methylglutaryl-CoA lyase(HMGCL)	3155	HMGCL	0.0308292	-1.40947	[-1.90730141004944, -1.40946800008196]
62530384	enoyl-CoA delta isomerase 1(ECI1)	1632	ECI1	0.032117	-2.05236	[-2.98764543631243, -2.05235839073798]
62739166	procollagen-lysine,2-oxoglutarate 5-dioxygenase 2(PLOD2)	5352	PLOD2	0.0121931	2.54538	[2.54537846249614, 3.5696719551373]
62751417	RAB, member of RAS oncogene family like 3(RABL3)	285282	RABL3	0.0188794	-1.01789	[-1.41956587064513, -1.01789443021446]
66932988	filamin binding LIM protein 1(FBLIM1)	54751	FBLIM1	0.0470958	1.07279	[1.07279047350993, 1.69012346781484]
74099697	heterogeneous nuclear ribonucleoprotein H2 (H')(HNRNPH2)	3188	HNRNPH2	0.00831435	-1.58519	[-2.02331952732486, -1.58518760321257]
76496472	ribosomal protein L3(RPL3)	6122	RPL3	0.0156338	1.41729	[1.41728592583132, 2.02429084295397]
91718899	mitogen-activated protein kinase 3(MAPK3)	5595	MAPK3	0.0249963	-0.981495	[-1.42903784181633, -0.981495416142686]
91984773	NAD(P)HX epimerase(NAXE)	128240	NAXE	0.0343029	-1.09764	[-1.5975819723318, -1.0976446733043]
94538320	hydroxyacylglutathione hydrolase(HAGH)	3029	HAGH	0.00450248	-1.35902	[-1.82969339498732, -1.35902120971426]
94721354	methylenetetrahydrofolate dehydrogenase (NADP+ dependent) 2, methenyltetrahydrofolate cyclohydrolase(MTHFD2)	10797	MTHFD2	0.0138942	1.69981	[1.69981027648521, 2.34562641068624]
109826351	melanophilin(MLPH)	79083	MLPH	0.0109588	-3.37703	[-4.80109420044401, -3.37702971657385]
109948283	pumilio RNA binding family member 3(PUM3)	9933	PUM3	0.00389528	1.43664	[1.43664070008143, 2.10916632703024]
116812600	StAR related lipid transfer domain containing 10(STARD10)	10809	STARD10	0.0395324	-3.69187	[-5.35225285762754, -3.69187320276708]
116812630	short chain dehydrogenase/reductase family 39U member 1(SDR39U1)	56948	SDR39U1	0.0223852	-1.03081	[-1.64752254780996, -1.0308088517001]
117168248	3-hydroxyacyl-CoA dehydratase 3(HACD3)	51495	HACD3	0.0311475	-1.39384	[-2.16273197572021, -1.39383619381352]
140161500	ankyrin repeat and sterile alpha motif domain containing 1A(ANKS1A)	23294	ANKS1A	0.0327507	0.726769	[0.726769364641824, 1.0562372347705]
148491070	CTP synthase 1(CTPS1)	1503	CTPS1	0.00324711	1.78598	[1.78598322314939, 2.37717873217915]
151108473	fission, mitochondrial 1(FIS1)	51024	FIS1	0.026587	-1.34274	[-1.87087553718199, -1.34274388142061]
156104895	inositol polyphosphate-4-phosphatase type II B(INPP4B)	8821	INPP4B	0.00759679	-2.73457	[-3.64968059973936, -2.73457100199922]
156416028	aspartyl aminopeptidase(DNPEP)	23549	DNPEP	0.0405393	-0.972189	[-1.41443800637622, -0.9721889751564]
156564401	N-ethylmaleimide sensitive factor, vesicle fusing ATPase(NSF)	4905	NSF	0.0129786	-1.34073	[-1.92616236406038, -1.34072832802013]
157168362	purine nucleoside phosphorylase(PNP)	4860	PNP	0.0164024	1.383	[1.38300306907926, 2.10173479706002]
157384956	nucleotide binding protein like(NUBPL)	80224	NUBPL	0.0191823	-1.41322	[-2.03759914325237, -1.41322438466817]
157502212	polypeptide N-acetylgalactosaminyltransferase 7(GALNT7)	51809	GALNT7	0.0485164	-2.13643	[-3.13362703830004, -2.13642779636844]
163644283	proteasome activator subunit 4(PSME4)	23198	PSME4	0.0223278	1.029	[1.02899958841345, 1.50295393589432]
163644313	calcium and integrin binding 1(CIB1)	10519	CIB1	0.037596	-2.15212	[-3.28060454596097, -2.15211699570417]
163965377	thiosulfate sulfurtransferase like domain containing 1(TSTD1)	100131187	TSTD1	0.00946221	-2.71246	[-3.74739658666344, -2.71245509660782]
166795299	solute carrier family 2 member 1(SLC2A1)	6513	SLC2A1	3e-05	5.98604	[5.98603600091323, 8.0303283199363]
167466198	intercellular adhesion molecule 1(ICAM1)	3383	ICAM1	0.019217	1.93313	[1.93312968773788, 2.80414151607443]
167830436	DEAH-box helicase 36(DHX36)	170506	DHX36	0.00775838	0.973968	[0.973967818804712, 1.52629740901217]
167860126	serpin family B member 5(SERPINB5)	5268	SERPINB5	0.00995356	4.64289	[4.64288908913076, 7.04307371083422]
167900484	pentraxin 3(PTX3)	5806	PTX3	0.0038414	4.07309	[4.07308900374517, 6.02530054320674]
187761324	shootin 1(SHTN1)	57698	SHTN1	0.00603964	-1.79272	[-2.31110691376318, -1.79271541532621]
188536080	4-aminobutyrate aminotransferase(ABAT)	18	ABAT	0.01171	-3.45848	[-4.593224415958, -3.45847725812537]
189458817	transferrin receptor(TFRC)	7037	TFRC	0.0220813	1.87849	[1.8784946456727, 2.70884609622469]
195546902	SPT5 homolog, DSIF elongation factor subunit(SUPT5H)	6829	SUPT5H	9.59e-05	1.28511	[1.28510556724832, 1.73092461111793]
205277445	single Ig and TIR domain containing(SIGIRR)	59307	SIGIRR	0.0220616	-1.77816	[-2.59734101167047, -1.77815700793168]
208431836	poly(A) binding protein cytoplasmic 4(PABPC4)	8761	PABPC4	0.00915956	1.21916	[1.21915840399506, 1.72088330521878]
209862833	amyloid beta precursor protein(APP)	351	APP	0.0376434	1.58419	[1.58418750189993, 2.66896635503908]
209869993	phosphoribosylglycinamide formyltransferase, phosphoribosylglycinamide synthetase, phosphoribosylaminoimidazole synthetase(GART)	2618	GART	0.0243099	0.792968	[0.792968252325821, 1.08745482947946]
212276096	LRR binding FLII interacting protein 1(LRRFIP1)	9208	LRRFIP1	0.0393397	-0.936458	[-1.34371110072634, -0.936458039059237]
217330644	WD repeat domain 12(WDR12)	55759	WDR12	0.00873808	1.31835	[1.3183505908224, 1.90186172813659]
222136641	NIMA related kinase 9(NEK9)	91754	NEK9	0.0362293	-0.772731	[-1.08750541009174, -0.772731464514374]
224589127	transmembrane protein 33(TMEM33)	55161	TMEM33	0.0139579	1.19528	[1.19528270354844, 1.81830653849962]
226246680	prostaglandin reductase 2(PTGR2)	145482	PTGR2	0.0264195	-1.76223	[-2.76182658337198, -1.76222544767888]
226371737	phosphatidylinositol-5-phosphate 4-kinase type 2 gamma(PIP4K2C)	79837	PIP4K2C	0.0142344	-1.24451	[-1.80903610998929, -1.24451446304739]
239582767	slingshot protein phosphatase 3(SSH3)	54961	SSH3	0.0191886	-1.63651	[-2.25393478749092, -1.63651292436966]
296010848	asparagine synthetase (glutamine-hydrolyzing)(ASNS)	440	ASNS	0.00598324	2.11849	[2.1184891310306, 2.97569811101656]
299758464	TBC1 domain family member 15(TBC1D15)	64786	TBC1D15	0.0068539	-0.770578	[-1.02583811419159, -0.77057807099279]
304571975	dicarbonyl and L-xylulose reductase(DCXR)	51181	DCXR	0.0418827	-1.73267	[-2.76276034186479, -1.73266604277244]
334724463	twinfilin actin binding protein 1(TWF1)	5756	TWF1	0.0348796	-0.974051	[-1.31601135263191, -0.97405057451793]
343168770	activated leukocyte cell adhesion molecule(ALCAM)	214	ALCAM	0.0447883	-2.86283	[-4.12732701655374, -2.86283306182354]
345498499	LPS responsive beige-like anchor protein(LRBA)	987	LRBA	0.00374822	-1.6362	[-2.2520063241355, -1.63619613475061]
354725902	RAB5B, member RAS oncogene family(RAB5B)	5869	RAB5B	0.025466	-0.959394	[-1.45048360980559, -0.959393868044207]
372466577	keratin 8(KRT8)	3856	KRT8	0.01603	-3.48967	[-4.70106884231614, -3.48966945194793]
373251164	glutaminase(GLS)	2744	GLS	0.0255605	1.7123	[1.71230418467614, 2.57355302753757]
394582093	minichromosome maintenance complex component 3(MCM3)	4172	MCM3	0.0034302	2.30926	[2.30925656815901, 3.33052966817539]
449083351	SEC16 homolog A, endoplasmic reticulum export factor(SEC16A)	9919	SEC16A	0.0147483	-1.03323	[-1.33786228179328, -1.03322799176746]
503774453	proline, glutamate and leucine rich protein 1(PELP1)	27043	PELP1	0.048274	0.685599	[0.68559858231636, 1.12496034807156]
525507384	acidic nuclear phosphoprotein 32 family member E(ANP32E)	81611	ANP32E	0.00180109	2.63308	[2.63308324410558, 3.8544450272844]
530360929	ER membrane protein complex subunit 1(EMC1)	23065	EMC1	0.0243146	0.775272	[0.775272366166177, 1.17954834410271]
530367934	rhotekin(RTKN)	6242	RTKN	0.027651	0.885107	[0.885106893743096, 1.31250271530917]
530369740	formin like 2(FMNL2)	114793	FMNL2	0.0256274	1.18374	[1.18374012901201, 1.7195384787962]
530383148	myosin VI(MYO6)	4646	MYO6	0.0284881	-3.09408	[-4.67062164943742, -3.09408254093447]
530411932	HID1 domain containing(HID1)	283987	HID1	0.00541253	-1.77417	[-2.23144328680797, -1.774171505056]
559098432	RAB guanine nucleotide exchange factor 1(RABGEF1)	27342	RABGEF1	0.0338376	-0.895748	[-1.2231258584635, -0.895747968108097]
559098473	SH3 domain containing GRB2 like endophilin B2(SH3GLB2)	56904	SH3GLB2	0.0192164	-1.03855	[-1.45454275076173, -1.03855234260077]
570359592	arginyltransferase 1(ATE1)	11101	ATE1	0.0125	-1.28101	[-1.75416571251287, -1.28100990095153]
578806491	5'-nucleotidase domain containing 2(NT5DC2)	64943	NT5DC2	0.00660323	1.45416	[1.45415585816277, 2.07491245419671]
578811175	endoplasmic reticulum-golgi intermediate compartment 1(ERGIC1)	57222	ERGIC1	0.024212	-2.12344	[-2.84848012866851, -2.12344265937987]
578812166	nucleoporin 153(NUP153)	9972	NUP153	0.00412187	1.09852	[1.0985221405961, 1.41766007240093]
578827419	thrombospondin type 1 domain containing 4(THSD4)	79875	THSD4	0.0112547	-3.27228	[-4.47194565553784, -3.27228296146452]
578837026	pescadillo ribosomal biogenesis factor 1(PES1)	23481	PES1	0.00271284	1.33952	[1.33952161519703, 1.81106107898928]
663429515	lysophospholipase like 1(LYPLAL1)	127018	LYPLAL1	0.0404256	-1.20893	[-1.80096708072313, -1.20893382865075]
767915156	TIA1 cytotoxic granule associated RNA binding protein(TIA1)	7072	TIA1	0.00548242	1.61953	[1.61952774063878, 2.172136184599]
767929051	cyclin G associated kinase(GAK)	2580	GAK	0.0127858	-0.949097	[-1.18506154380153, -0.94909726250511]
767942600	methylenetetrahydrofolate dehydrogenase (NADP+ dependent) 1-like(MTHFD1L)	25902	MTHFD1L	0.000184256	2.28953	[2.28953217873511, 3.04996384496231]
767958755	tight junction protein 2(TJP2)	9414	TJP2	0.0120688	1.2823	[1.28229943286083, 2.13630587915407]
767972112	coiled-coil domain containing 91(CCDC91)	55297	CCDC91	0.0322289	-1.23853	[-1.8928409185719, -1.23853244880543]
767996555	aminopeptidase puromycin sensitive(NPEPPS)	9520	NPEPPS	0.0380938	-1.63624	[-2.20614911899657, -1.63624161418896]
767997907	RNA guanine-7 methyltransferase(RNMT)	8731	RNMT	0.0246847	0.958043	[0.958042870257302, 1.46383686422093]
809281400	atlastin GTPase 2(ATL2)	64225	ATL2	0.00123883	2.02685	[2.02684980864405, 2.81105669944604]
1002341781	karyopherin subunit alpha 2(KPNA2)	3838	KPNA2	0.0109705	2.00436	[2.00435663383336, 2.70907127971372]
1004170672	cyclin dependent kinase 1(CDK1)	983	CDK1	0.0203788	1.83339	[1.83338697383545, 2.60797310151176]
1005880651	integrin subunit beta 4(ITGB4)	3691	ITGB4	0.00344746	1.92287	[1.92286990769793, 2.66573159364507]
1016080631	basigin (Ok blood group)(BSG)	682	BSG	0.0024288	2.03225	[2.03224871438024, 2.81365020729302]
1017029493	glutathione synthetase(GSS)	2937	GSS	0.000273009	-1.72447	[-2.32568067451871, -1.72447030252007]
1034555654	cellular retinoic acid binding protein 2(CRABP2)	1382	CRABP2	0.0403325	-3.35951	[-4.93492692567434, -3.35950805634978]
1034555730	BRO1 domain and CAAX motif containing(BROX)	148362	BROX	0.0224748	-1.39232	[-1.99693050665611, -1.39231960974292]
1034571673	tripartite motif containing 3(TRIM3)	10612	TRIM3	0.0449952	-1.19155	[-1.90065087109572, -1.19154595771285]
1034572967	triokinase and FMN cyclase(TKFC)	26007	TKFC	0.0240374	-1.62793	[-2.34913977379586, -1.62793189804445]
1034576106	embryonic ectoderm development(EED)	8726	EED	0.0183455	1.12581	[1.12580933607917, 1.71001615970864]
1034587017	kinectin 1(KTN1)	3895	KTN1	0.0248229	-1.3145	[-1.93102144236855, -1.31450166000742]
1034587271	Enah/Vasp-like(EVL)	51466	EVL	0.0421899	-1.86892	[-2.57135614626307, -1.86891545650829]
1034590514	isovaleryl-CoA dehydrogenase(IVD)	3712	IVD	0.000358866	-2.42256	[-3.15345029962475, -2.42256350195301]
1034604114	NPC intracellular cholesterol transporter 1(NPC1)	4864	NPC1	0.0013299	1.59088	[1.59088347788465, 2.09373494852288]
1034604510	RAB27B, member RAS oncogene family(RAB27B)	5874	RAB27B	0.00633764	-3.61137	[-4.85114853785362, -3.61136608632595]
1034604883	haloacid dehalogenase like hydrolase domain containing 2(HDHD2)	84064	HDHD2	0.0461558	-1.16928	[-1.65878314751674, -1.16927928343726]
1034629275	Ran GTPase activating protein 1(RANGAP1)	5905	RANGAP1	0.0269283	0.64419	[0.644189605483216, 0.870153970330556]
1034634976	3-hydroxybutyrate dehydrogenase, type 1(BDH1)	622	BDH1	0.048586	-1.64356	[-2.64765432986744, -1.64356354461142]
1034636253	guanine monophosphate synthase(GMPS)	8833	GMPS	0.00503413	1.33108	[1.3310751818816, 1.90610486516067]
1034643585	carboxymethylenebutenolidase homolog(CMBL)	134147	CMBL	0.000886168	-3.75755	[-4.61644369014427, -3.75755406206951]
1034663579	structural maintenance of chromosomes 2(SMC2)	10592	SMC2	8.31e-05	2.17405	[2.17405376958482, 2.69889215690874]
1034665350	nuclear factor I B(NFIB)	4781	NFIB	0.000125285	3.82155	[3.8215466311766, 4.94322467608048]
1034675694	synaptotagmin like 4(SYTL4)	94121	SYTL4	0.0423699	-2.09043	[-3.08658488768277, -2.09042640124806]

## Sheet: 164 proteins
Common Consensus Significant Proteins from Both Comparisons
Protein Accession	Definition	geneID	Gene Symbol	adj.P_representative (TN vs. LA)	log2FC_representative (TN/LA)	log2FC (range, TN/ LA)	adj.P_representative (TN vs. LB1)	log2FC_representative (TN/LB1)	log2FC (range, TN/ LB1)
4501859	acyl-CoA dehydrogenase, short/branched chain(ACADSB)	36	ACADSB	0.00227358	-2.76622	[-3.72824376842457, -2.76622469161662]	0.00746139	-2.99714	[-3.95942803614845, -2.99713984989025]
4502281	ATPase Na+/K+ transporting subunit beta 3(ATP1B3)	483	ATP1B3	0.0419007	1.30376	[1.30375774587104, 2.14550470999584]	0.0351533	1.33446	[1.33445598117698, 2.06574259677579]
4502847	cold inducible RNA binding protein(CIRBP)	1153	CIRBP	0.000141479	-2.54855	[-3.12682518988751, -2.54855088622807]	0.0169631	-1.88012	[-2.6904992684837, -1.88011635352772]
4503249	DEK proto-oncogene(DEK)	7913	DEK	9.25e-05	2.09267	[2.09267259585264, 2.80274397929364]	0.0146232	1.28655	[1.2865483615052, 1.91834838821361]
4503481	eukaryotic translation elongation factor 1 gamma(EEF1G)	1937	EEF1G	0.00365666	1.39723	[1.39722659781418, 2.05557535225537]	0.037246	0.927818	[0.927817882953993, 1.50778387301927]
4503571	enolase 1(ENO1)	2023	ENO1	0.000483681	2.42122	[2.42121645246206, 3.23475380666422]	0.00284706	2.25373	[2.25373495783304, 3.06515718332339]
4503909	guanidinoacetate N-methyltransferase(GAMT)	2593	GAMT	4.9e-05	-2.6801	[-3.24803966560786, -2.68009698843582]	0.000505619	-2.46572	[-3.22793741296984, -2.46571692105093]
4504191	mutS homolog 6(MSH6)	2956	MSH6	0.00199099	1.8817	[1.88170499570179, 2.49158709493582]	0.00352493	1.38514	[1.38513708327211, 2.08908810165785]
4504279	H3 histone family member 3A(H3F3A)	3020	H3F3A	0.00532276	-1.69714	[-2.45837837565008, -1.69713976932694]	0.0464184	-1.39322	[-2.02688433872982, -1.39322161189743]
4505343	nuclear cap binding protein subunit 1(NCBP1)	4686	NCBP1	0.00218942	1.43096	[1.43096098700867, 2.03095938555234]	0.00630237	1.00688	[1.0068831400151, 1.61928904072272]
4505621	phosphatidylethanolamine binding protein 1(PEBP1)	5037	PEBP1	0.0130069	-1.31131	[-1.92417545184038, -1.31130878096324]	0.0257719	-1.58573	[-2.20534244281088, -1.5857340290479]
4505891	procollagen-lysine,2-oxoglutarate 5-dioxygenase 3(PLOD3)	8985	PLOD3	0.00602766	1.30049	[1.30049331482955, 1.86965336713758]	0.00179156	1.5877	[1.58770332915381, 1.96259349697317]
4507115	fascin actin-bundling protein 1(FSCN1)	6624	FSCN1	0.00370641	2.30491	[2.30491207362099, 3.42130497588997]	7.41e-05	3.29849	[3.29848517707296, 4.30627849947397]
4507149	superoxide dismutase 1, soluble(SOD1)	6647	SOD1	0.0270503	-1.26106	[-2.08345669218383, -1.26105645895268]	0.0255933	-1.59552	[-2.32299523858179, -1.59552168724637]
4507185	sepiapterin reductase (7,8-dihydrobiopterin:NADP+ oxidoreductase)(SPR)	6697	SPR	0.00556526	-1.88798	[-2.92614440835031, -1.8879799415678]	0.00777194	-2.54196	[-3.26317395086647, -2.54195518491731]
4507801	small ubiquitin-like modifier 1(SUMO1)	7341	SUMO1	0.00134816	1.57397	[1.57397484442433, 2.152773663284]	0.0422275	1.04914	[1.0491376214721, 1.61547420283314]
4507947	tyrosyl-tRNA synthetase(YARS)	8565	YARS	0.00188474	1.19338	[1.19337885617858, 1.62805933378669]	0.00704625	1.07459	[1.07459282208003, 1.46769488183834]
4557761	mutS homolog 2(MSH2)	4436	MSH2	0.00679431	1.25382	[1.25382056423446, 1.8747648824991]	0.0105462	0.979489	[0.979488574981934, 1.56704333106095]
4557831	pterin-4 alpha-carbinolamine dehydratase 1(PCBD1)	5092	PCBD1	0.0291503	-1.37979	[-2.13685521958272, -1.37979396484837]	0.0219946	-2.27745	[-3.10602284513572, -2.27744839380326]
4758442	glia maturation factor beta(GMFB)	2764	GMFB	0.00610635	-1.1457	[-1.66366831500777, -1.14569659682765]	0.0294028	-0.994636	[-1.49567623954396, -0.99463626195828]
4885281	glutamate dehydrogenase 1(GLUD1)	2746	GLUD1	0.00774669	-1.86052	[-2.67396936075002, -1.86051846360385]	0.0145799	-1.9361	[-2.56388757662451, -1.93609633217494]
4885373	histone cluster 1 H1 family member a(HIST1H1A)	3024	HIST1H1A	0.000442269	5.41549	[5.41548828751214, 7.21144443267888]	5.43e-07	6.6435	[6.64350201275271, 7.96416445968724]
5174447	receptor for activated C kinase 1(RACK1)	10399	RACK1	0.0116569	0.943554	[0.943554330141307, 1.41355108777585]	0.0251488	0.752166	[0.752165756566421, 1.19809176905104]
5454088	acidic nuclear phosphoprotein 32 family member B(ANP32B)	10541	ANP32B	9.54e-05	2.18029	[2.18029430397934, 2.72229610345737]	0.0207966	1.40528	[1.40528276806974, 2.03495227791262]
5454090	signal sequence receptor subunit 4(SSR4)	6748	SSR4	0.0328641	1.44164	[1.44163511268192, 2.51272651858652]	0.0401263	1.63863	[1.63863010657472, 2.71723635729323]
5729770	tripeptidyl peptidase 1(TPP1)	1200	TPP1	0.0230372	-1.39608	[-2.27548391678805, -1.39608365134899]	0.0488705	-0.947184	[-1.35556366348959, -0.947183731500218]
5802976	adipogenesis regulatory factor(ADIRF)	10974	ADIRF	0.00548931	-4.35402	[-6.61403899412385, -4.35402377818233]	0.0336721	-4.2027	[-6.18735488793328, -4.20269842124214]
6005757	SPT16 homolog, facilitates chromatin remodeling subunit(SUPT16H)	11198	SUPT16H	0.00130114	1.63589	[1.63589380229296, 2.24294674883055]	0.0402862	0.966118	[0.966117502692279, 1.52724810930664]
6912356	echinoderm microtubule associated protein like 2(EML2)	24139	EML2	0.00995942	-1.99387	[-2.986155903424, -1.99387209619832]	0.00679365	-2.3519	[-3.2418277409789, -2.35189974626344]
7427519	minichromosome maintenance complex component 6(MCM6)	4175	MCM6	0.000983691	3.42685	[3.42685485822171, 4.41798388159799]	0.00819606	2.42983	[2.42983348466092, 3.69698192020036]
7657033	5', 3'-nucleotidase, cytosolic(NT5C)	30833	NT5C	0.00386959	-1.2905	[-1.73711547952877, -1.29050179558298]	0.0439223	-0.9337	[-1.33651346490435, -0.933700243149687]
7661920	eukaryotic translation initiation factor 4A3(EIF4A3)	9775	EIF4A3	0.00716383	1.07547	[1.07547231040433, 1.54153993371594]	0.0259536	0.720802	[0.720802101736895, 1.09248883485758]
7705437	NIP7, nucleolar pre-rRNA processing protein(NIP7)	51388	NIP7	0.00912079	1.4825	[1.48249643945877, 2.09453085503325]	0.0324402	1.19241	[1.19240553935258, 1.76004430997618]
7705696	thioredoxin domain containing 12(TXNDC12)	51060	TXNDC12	0.00328615	1.30243	[1.30242903425427, 1.83624493380355]	0.00751784	1.31225	[1.31225263280385, 1.84898428901922]
7705855	hydroxysteroid 17-beta dehydrogenase 12(HSD17B12)	51144	HSD17B12	0.0142989	1.05409	[1.05408908864502, 1.78555916274796]	0.0479627	1.38878	[1.38877592002056, 2.15405681122256]
10337595	protein phosphatase, Mg2+/Mn2+ dependent 1A(PPM1A)	5494	PPM1A	0.00453322	-0.985607	[-1.38211380816186, -0.985606667146661]	0.00759679	-0.989668	[-1.38979062576177, -0.989667816717711]
11095441	aldehyde dehydrogenase 6 family member A1(ALDH6A1)	4329	ALDH6A1	0.000109827	-2.80469	[-3.60741926076123, -2.80469412899587]	0.00399583	-2.29569	[-3.00021401033349, -2.29568612783228]
11321601	phosphofructokinase, platelet(PFKP)	5214	PFKP	0.000480787	2.71921	[2.71920795904245, 3.57673801134421]	0.00459379	2.70454	[2.70453751948735, 3.54013515666223]
13375746	acidic residue methyltransferase 1(ARMT1)	79624	ARMT1	0.0264894	-2.34445	[-3.45202865378637, -2.34444539885523]	0.0238404	-3.0568	[-4.09476446936201, -3.05679753775492]
14141195	stromal cell derived factor 2(SDF2)	6388	SDF2	0.0306905	1.3472	[1.34720165001046, 2.53122839565416]	0.0380594	1.46235	[1.46234552257885, 2.66273462540743]
14150134	coiled-coil-helix-coiled-coil-helix domain containing 6(CHCHD6)	84303	CHCHD6	0.0392802	-1.06432	[-1.59499693867431, -1.06431920779609]	0.0498299	-1.22556	[-1.823947896759, -1.22556185554726]
14249382	abhydrolase domain containing 14B(ABHD14B)	84836	ABHD14B	0.00531994	-1.72494	[-2.4885552044883, -1.72493943934894]	0.0246863	-1.8134	[-2.49515228011216, -1.81339817985704]
14249478	chromosome 1 open reading frame 198(C1orf198)	84886	C1orf198	0.0369743	1.27782	[1.27782273960302, 2.0630239688914]	0.0205478	1.78688	[1.78688258202982, 2.57356675380667]
15277342	hydroxysteroid 17-beta dehydrogenase 8(HSD17B8)	7923	HSD17B8	0.00477186	-1.7945	[-2.57380469481843, -1.79450334140335]	0.0472296	-1.16806	[-1.74170877558547, -1.16806493859552]
19923919	receptor accessory protein 6(REEP6)	92840	REEP6	0.00179762	-5.1284	[-6.96974954789174, -5.12839661068008]	0.0148877	-3.95701	[-5.28332115969363, -3.95701074072682]
21361647	adenosylhomocysteinase like 1(AHCYL1)	10768	AHCYL1	0.0150006	-1.0776	[-1.67887678010899, -1.07759875083162]	0.0178859	-1.13875	[-1.60632310027271, -1.13875187492599]
22219465	nudix hydrolase 2(NUDT2)	318	NUDT2	0.0317693	-1.31212	[-2.22639135363309, -1.31212262686908]	0.026335	-1.22316	[-1.95742212027919, -1.22315700881221]
22748937	exportin 5(XPO5)	57510	XPO5	0.00928063	1.59034	[1.59033913900567, 2.31779751336868]	0.0245187	1.39229	[1.3922926550773, 2.13642159407911]
23308577	phosphoglycerate dehydrogenase(PHGDH)	26227	PHGDH	0.00193777	4.49202	[4.49201874757491, 6.48502269926304]	0.000578376	4.57932	[4.57932455764868, 6.29362566475756]
23510448	minichromosome maintenance complex component 5(MCM5)	4174	MCM5	0.000636238	2.42382	[2.42381756718962, 3.1393253557886]	0.00743126	1.97608	[1.97608156862319, 2.92868058611014]
23510451	acylaminoacyl-peptide hydrolase(APEH)	327	APEH	0.00908427	-0.991899	[-1.41652235711974, -0.991899472734725]	0.0251553	-1.06849	[-1.42856184619442, -1.06849429026297]
24307999	glycerol-3-phosphate dehydrogenase 1-like(GPD1L)	23171	GPD1L	0.0170388	-2.26125	[-3.51962167402714, -2.2612525785023]	0.0293541	-2.53922	[-3.75326247609632, -2.5392188654115]
24475861	phosphohistidine phosphatase 1(PHPT1)	29085	PHPT1	0.000368456	-2.14575	[-2.83940207866558, -2.14574892959118]	0.00780289	-1.5314	[-2.14974347431938, -1.53140061066048]
27262628	nuclear autoantigenic sperm protein(NASP)	4678	NASP	0.000480787	2.85635	[2.85634707283524, 3.71388690222411]	2.66e-05	2.49146	[2.49146289029782, 3.35327965836688]
28827801	anterior gradient 3, protein disulphide isomerase family member(AGR3)	155465	AGR3	0.0030089	-4.54785	[-6.29485720893552, -4.54784706344094]	0.00889683	-4.7548	[-6.72244206319005, -4.75480457916482]
28866947	metallothionein 1F(MT1F)	4494	MT1F	0.0461627	2.53479	[2.53479444114402, 4.4335272534908]	0.0212662	4.06807	[4.06806574208969, 5.96825207923179]
29171702	pyrophosphatase (inorganic) 2(PPA2)	27068	PPA2	0.011866	-1.39885	[-2.00494974460189, -1.3988488139904]	0.0160143	-1.38947	[-2.00880268462579, -1.3894681653655]
29725609	epidermal growth factor receptor(EGFR)	1956	EGFR	0.0400038	1.5714	[1.57140235475946, 2.79664122186895]	0.00103523	3.54236	[3.54235569998637, 4.44888957522801]
31377697	collagen beta(1-O)galactosyltransferase 1(COLGALT1)	79709	COLGALT1	0.00558527	1.35261	[1.35261154236104, 1.95512403697865]	0.00444542	1.59158	[1.59157762482105, 2.09211298266028]
31377798	rabaptin, RAB GTPase binding effector protein 1(RABEP1)	9135	RABEP1	0.000524192	-2.07882	[-2.63356216105774, -2.07882292327724]	0.00701847	-2.01082	[-2.59836363375875, -2.01082082425127]
31543106	basal cell adhesion molecule (Lutheran blood group)(BCAM)	4059	BCAM	0.00235552	-2.11829	[-2.90516903727503, -2.11829096042187]	0.0429159	-1.99023	[-3.04009057137923, -1.99022548796385]
32307144	procollagen-lysine,2-oxoglutarate 5-dioxygenase 1(PLOD1)	5351	PLOD1	0.0277804	1.26768	[1.26768433633014, 2.0824040293206]	0.00723094	1.80321	[1.80320983955743, 2.51842239966814]
33356547	minichromosome maintenance complex component 2(MCM2)	4171	MCM2	0.000271714	2.91373	[2.91372696482649, 3.67725545383383]	0.00390523	2.3178	[2.31779767876548, 3.31038563197583]
33457311	magnesium dependent phosphatase 1(MDP1)	145553	MDP1	0.0337953	-0.857335	[-1.43563120400853, -0.857335434906493]	0.0433263	-0.825378	[-1.28140635884778, -0.825377551022205]
33469917	minichromosome maintenance complex component 4(MCM4)	4173	MCM4	0.001159	2.57219	[2.57218679307885, 3.45265237131937]	0.0207135	1.88814	[1.88813946042656, 3.08618322990086]
33469968	minichromosome maintenance complex component 7(MCM7)	4176	MCM7	0.00172826	2.50791	[2.50791395420941, 3.33483979554878]	0.00895126	1.94068	[1.94068441388994, 3.02308779000989]
33598950	podocalyxin like(PODXL)	5420	PODXL	0.0204983	2.08037	[2.08037233468159, 3.13589974467449]	0.000273009	3.49469	[3.49468986463663, 4.35351624860994]
34452732	phosphatidylinositol-3,4,5-trisphosphate dependent Rac exchange factor 1(PREX1)	57580	PREX1	0.0224333	-1.48809	[-2.57469531127352, -1.48808769997231]	0.048131	-1.38579	[-2.0909470703335, -1.38578977852546]
37693993	NME/NM23 nucleoside diphosphate kinase 3(NME3)	4832	NME3	0.00544725	-1.81871	[-2.68592112539957, -1.81871099179932]	0.00310907	-2.04725	[-2.65783194060848, -2.04724676007766]
38327634	DEAD-box helicase 18(DDX18)	8886	DDX18	0.001159	1.67157	[1.67156988024511, 2.37347144652383]	0.000324883	1.5446	[1.54460021778901, 2.06528563414155]
39930541	chromosome 9 open reading frame 142(C9orf142)	286257	C9orf142	0.0116437	-0.987536	[-1.53949962269421, -0.98753590017089]	0.0227877	-1.09797	[-1.50057704867338, -1.09797112147802]
40254992	carbonyl reductase 4(CBR4)	84869	CBR4	0.00859218	-1.87164	[-2.64563682237063, -1.87163915742556]	0.004418	-1.76204	[-2.25853197889245, -1.76204490244741]
40354195	keratin 18(KRT18)	3875	KRT18	0.00596738	-3.88142	[-5.74329440313325, -3.88142464666088]	0.0255072	-3.59064	[-5.4850421636814, -3.59063936244197]
41327764	aldo-keto reductase family 7 member A2(AKR7A2)	8574	AKR7A2	0.00089684	-1.84027	[-2.42382874330811, -1.84027023188929]	0.0100213	-1.75479	[-2.29713793716272, -1.75479262196061]
44890050	stathmin 1(STMN1)	3925	STMN1	0.00134953	2.74933	[2.74932957363807, 3.77470115509524]	0.018626	1.91174	[1.91173684001674, 2.99726067057917]
45935383	carbonic anhydrase 12(CA12)	771	CA12	0.0205431	-2.58936	[-4.08069940616578, -2.58935669147346]	0.00929813	-2.88552	[-4.15399894441613, -2.88552429074192]
46094058	3'-phosphoadenosine 5'-phosphosulfate synthase 1(PAPSS1)	9061	PAPSS1	0.0494271	0.845195	[0.845195272829049, 1.52445076860246]	0.026802	1.08986	[1.08986228661474, 1.72986743447629]
47419936	SRSF protein kinase 1(SRPK1)	6732	SRPK1	0.0227623	1.19557	[1.1955728001894, 1.73122916927835]	0.0218853	1.17481	[1.17481198102729, 1.67037953463079]
49574502	cytochrome b5 reductase 1(CYB5R1)	51706	CYB5R1	0.0159451	-1.46777	[-2.87301654705543, -1.46776755661748]	0.0065026	-2.21387	[-3.30593806001625, -2.2138684537894]
50428938	arsA arsenite transporter, ATP-binding, homolog 1 (bacterial)(ASNA1)	439	ASNA1	0.0252163	-0.85063	[-1.25822716235158, -0.85063015439836]	0.0168516	-0.885611	[-1.21902807784109, -0.88561081222728]
50541948	guanosine monophosphate reductase 2(GMPR2)	51292	GMPR2	0.000411996	-1.7609	[-2.30673279718022, -1.7609017658752]	0.0122429	-1.2899	[-1.93169515533536, -1.28990068335828]
50658063	structural maintenance of chromosomes 4(SMC4)	10051	SMC4	0.00200668	1.91031	[1.91030760369902, 2.66368610719535]	0.0018989	1.66114	[1.6611384828158, 2.26483611258725]
50658084	branched chain amino acid transaminase 2(BCAT2)	587	BCAT2	0.00902611	-1.31311	[-1.82559901730471, -1.31311032757005]	0.0141309	-1.6269	[-2.24519805667286, -1.62690050156096]
56181387	STIP1 homology and U-box containing protein 1(STUB1)	10273	STUB1	0.00510371	-1.24279	[-1.76104086396316, -1.24279237567735]	0.00987763	-1.57834	[-2.03528288428678, -1.57834401946784]
61744483	solute carrier family 3 member 2(SLC3A2)	6520	SLC3A2	0.00125377	2.29224	[2.29223615050334, 3.33398395807089]	0.00673458	1.87619	[1.87619349009325, 2.77326013447525]
62198232	3-hydroxymethyl-3-methylglutaryl-CoA lyase(HMGCL)	3155	HMGCL	0.0374756	-1.29131	[-2.13292206731765, -1.29131141802593]	0.0308292	-1.40947	[-1.90730141004944, -1.40946800008196]
62739166	procollagen-lysine,2-oxoglutarate 5-dioxygenase 2(PLOD2)	5352	PLOD2	0.00653588	2.40431	[2.40430519816708, 3.56862860442947]	0.0121931	2.54538	[2.54537846249614, 3.5696719551373]
62751417	RAB, member of RAS oncogene family like 3(RABL3)	285282	RABL3	0.0333261	-1.05633	[-1.6695490123198, -1.05632930211837]	0.0188794	-1.01789	[-1.41956587064513, -1.01789443021446]
74099697	heterogeneous nuclear ribonucleoprotein H2 (H')(HNRNPH2)	3188	HNRNPH2	0.00363467	-1.68596	[-2.22545911457798, -1.68596080451488]	0.00831435	-1.58519	[-2.02331952732486, -1.58518760321257]
91718899	mitogen-activated protein kinase 3(MAPK3)	5595	MAPK3	0.0185866	-0.901849	[-1.39288642143452, -0.901848868707086]	0.0249963	-0.981495	[-1.42903784181633, -0.981495416142686]
94538320	hydroxyacylglutathione hydrolase(HAGH)	3029	HAGH	0.00759564	-1.43588	[-1.9608616527336, -1.43587702631665]	0.00450248	-1.35902	[-1.82969339498732, -1.35902120971426]
94721354	methylenetetrahydrofolate dehydrogenase (NADP+ dependent) 2, methenyltetrahydrofolate cyclohydrolase(MTHFD2)	10797	MTHFD2	0.0498143	1.39303	[1.39303017673138, 2.07432594165901]	0.0138942	1.69981	[1.69981027648521, 2.34562641068624]
109826351	melanophilin(MLPH)	79083	MLPH	0.00139443	-4.03022	[-5.6477721733837, -4.0302164722845]	0.0109588	-3.37703	[-4.80109420044401, -3.37702971657385]
109948283	pumilio RNA binding family member 3(PUM3)	9933	PUM3	0.00243772	1.73648	[1.73648304397086, 2.60925234897107]	0.00389528	1.43664	[1.43664070008143, 2.10916632703024]
116812600	StAR related lipid transfer domain containing 10(STARD10)	10809	STARD10	0.00610864	-3.19746	[-4.59574279762379, -3.19746338859979]	0.0395324	-3.69187	[-5.35225285762754, -3.69187320276708]
116812630	short chain dehydrogenase/reductase family 39U member 1(SDR39U1)	56948	SDR39U1	0.0105522	-1.27046	[-1.88395601156463, -1.27046330175689]	0.0223852	-1.03081	[-1.64752254780996, -1.0308088517001]
117168248	3-hydroxyacyl-CoA dehydratase 3(HACD3)	51495	HACD3	0.0492651	-1.1586	[-2.0072530197869, -1.15859640031233]	0.0311475	-1.39384	[-2.16273197572021, -1.39383619381352]
140161500	ankyrin repeat and sterile alpha motif domain containing 1A(ANKS1A)	23294	ANKS1A	0.0344143	0.635579	[0.635579275110396, 0.958919204689452]	0.0327507	0.726769	[0.726769364641824, 1.0562372347705]
148491070	CTP synthase 1(CTPS1)	1503	CTPS1	7.93e-05	2.27715	[2.27714787659653, 2.92121141682629]	0.00324711	1.78598	[1.78598322314939, 2.37717873217915]
151108473	fission, mitochondrial 1(FIS1)	51024	FIS1	0.0165282	-1.14118	[-1.78126558652695, -1.14118427180221]	0.026587	-1.34274	[-1.87087553718199, -1.34274388142061]
156104895	inositol polyphosphate-4-phosphatase type II B(INPP4B)	8821	INPP4B	0.0148447	-2.69583	[-3.84274582488807, -2.69582624922873]	0.00759679	-2.73457	[-3.64968059973936, -2.73457100199922]
156416028	aspartyl aminopeptidase(DNPEP)	23549	DNPEP	0.0113994	-1.23804	[-1.8775215355438, -1.23803769354556]	0.0405393	-0.972189	[-1.41443800637622, -0.9721889751564]
156564401	N-ethylmaleimide sensitive factor, vesicle fusing ATPase(NSF)	4905	NSF	0.0245857	-1.07025	[-1.62263042639011, -1.07025116782594]	0.0129786	-1.34073	[-1.92616236406038, -1.34072832802013]
157168362	purine nucleoside phosphorylase(PNP)	4860	PNP	0.0147426	1.20133	[1.20133265841559, 1.9529059811128]	0.0164024	1.383	[1.38300306907926, 2.10173479706002]
157384956	nucleotide binding protein like(NUBPL)	80224	NUBPL	0.00184701	-1.90954	[-2.50698810581936, -1.90953772272961]	0.0191823	-1.41322	[-2.03759914325237, -1.41322438466817]
163644313	calcium and integrin binding 1(CIB1)	10519	CIB1	0.0346638	-2.01941	[-3.47289207402538, -2.01941331226622]	0.037596	-2.15212	[-3.28060454596097, -2.15211699570417]
163965377	thiosulfate sulfurtransferase like domain containing 1(TSTD1)	100131187	TSTD1	0.00297666	-3.00316	[-3.99096728383472, -3.00315616232105]	0.00946221	-2.71246	[-3.74739658666344, -2.71245509660782]
166795299	solute carrier family 2 member 1(SLC2A1)	6513	SLC2A1	0.00154911	5.16397	[5.16396781192014, 7.42608938885213]	3e-05	5.98604	[5.98603600091323, 8.0303283199363]
167466198	intercellular adhesion molecule 1(ICAM1)	3383	ICAM1	0.00171329	2.06695	[2.06694650603871, 2.83072169584962]	0.019217	1.93313	[1.93312968773788, 2.80414151607443]
188536080	4-aminobutyrate aminotransferase(ABAT)	18	ABAT	0.00359342	-3.37074	[-5.20494874558962, -3.37074483038084]	0.01171	-3.45848	[-4.593224415958, -3.45847725812537]
189458817	transferrin receptor(TFRC)	7037	TFRC	0.00678083	2.06768	[2.06767547328073, 2.93944299659287]	0.0220813	1.87849	[1.8784946456727, 2.70884609622469]
195546902	SPT5 homolog, DSIF elongation factor subunit(SUPT5H)	6829	SUPT5H	0.0027282	1.21501	[1.21501073497078, 1.70177398706737]	9.59e-05	1.28511	[1.28510556724832, 1.73092461111793]
209869993	phosphoribosylglycinamide formyltransferase, phosphoribosylglycinamide synthetase, phosphoribosylaminoimidazole synthetase(GART)	2618	GART	0.00146515	1.09158	[1.09157638922109, 1.40336820981205]	0.0243099	0.792968	[0.792968252325821, 1.08745482947946]
217330644	WD repeat domain 12(WDR12)	55759	WDR12	0.0253503	1.42107	[1.42107478820564, 2.20995081448376]	0.00873808	1.31835	[1.3183505908224, 1.90186172813659]
222136641	NIMA related kinase 9(NEK9)	91754	NEK9	0.0157617	-0.857417	[-1.23967912728119, -0.857416988214693]	0.0362293	-0.772731	[-1.08750541009174, -0.772731464514374]
224589127	transmembrane protein 33(TMEM33)	55161	TMEM33	0.0129256	1.20118	[1.20117828551506, 1.76511030771935]	0.0139579	1.19528	[1.19528270354844, 1.81830653849962]
226246680	prostaglandin reductase 2(PTGR2)	145482	PTGR2	0.00271314	-2.4049	[-3.30444811895318, -2.40490415521716]	0.0264195	-1.76223	[-2.76182658337198, -1.76222544767888]
226371737	phosphatidylinositol-5-phosphate 4-kinase type 2 gamma(PIP4K2C)	79837	PIP4K2C	0.0485355	-0.762789	[-1.3332431441209, -0.76278858716883]	0.0142344	-1.24451	[-1.80903610998929, -1.24451446304739]
239582767	slingshot protein phosphatase 3(SSH3)	54961	SSH3	0.00252799	-1.66696	[-2.28066464079321, -1.66696038610001]	0.0191886	-1.63651	[-2.25393478749092, -1.63651292436966]
296010848	asparagine synthetase (glutamine-hydrolyzing)(ASNS)	440	ASNS	0.00500128	2.12227	[2.122274724471, 3.07073851972014]	0.00598324	2.11849	[2.1184891310306, 2.97569811101656]
304571975	dicarbonyl and L-xylulose reductase(DCXR)	51181	DCXR	0.0231088	-1.62426	[-2.77775532851616, -1.62426434474033]	0.0418827	-1.73267	[-2.76276034186479, -1.73266604277244]
334724463	twinfilin actin binding protein 1(TWF1)	5756	TWF1	0.0285882	-1.05325	[-1.49955899871884, -1.05325184956901]	0.0348796	-0.974051	[-1.31601135263191, -0.97405057451793]
343168770	activated leukocyte cell adhesion molecule(ALCAM)	214	ALCAM	0.0220918	-3.41993	[-5.63047965302449, -3.4199270355443]	0.0447883	-2.86283	[-4.12732701655374, -2.86283306182354]
345498499	LPS responsive beige-like anchor protein(LRBA)	987	LRBA	0.00433536	-1.33508	[-2.00429294443202, -1.33508269304316]	0.00374822	-1.6362	[-2.2520063241355, -1.63619613475061]
354725902	RAB5B, member RAS oncogene family(RAB5B)	5869	RAB5B	0.00517739	-1.19557	[-1.65524266755166, -1.19556877257461]	0.025466	-0.959394	[-1.45048360980559, -0.959393868044207]
372466577	keratin 8(KRT8)	3856	KRT8	0.0101004	-3.34802	[-4.81751416516711, -3.34802288796377]	0.01603	-3.48967	[-4.70106884231614, -3.48966945194793]
394582093	minichromosome maintenance complex component 3(MCM3)	4172	MCM3	0.000160174	3.0522	[3.05220368754187, 3.81449770611123]	0.0034302	2.30926	[2.30925656815901, 3.33052966817539]
449083351	SEC16 homolog A, endoplasmic reticulum export factor(SEC16A)	9919	SEC16A	0.00953389	-1.13028	[-1.56741726731678, -1.13027638343206]	0.0147483	-1.03323	[-1.33786228179328, -1.03322799176746]
525507384	acidic nuclear phosphoprotein 32 family member E(ANP32E)	81611	ANP32E	0.000103162	3.53853	[3.53853300721224, 4.59853723824964]	0.00180109	2.63308	[2.63308324410558, 3.8544450272844]
530383148	myosin VI(MYO6)	4646	MYO6	0.00402221	-4.10048	[-5.66598700095804, -4.10048356290002]	0.0284881	-3.09408	[-4.67062164943742, -3.09408254093447]
530411932	HID1 domain containing(HID1)	283987	HID1	0.00279602	-1.6142	[-2.2246126922334, -1.61420337585545]	0.00541253	-1.77417	[-2.23144328680797, -1.774171505056]
559098432	RAB guanine nucleotide exchange factor 1(RABGEF1)	27342	RABGEF1	0.0399604	-0.810982	[-1.28725311416304, -0.810981752204252]	0.0338376	-0.895748	[-1.2231258584635, -0.895747968108097]
559098473	SH3 domain containing GRB2 like endophilin B2(SH3GLB2)	56904	SH3GLB2	0.011891	-1.00795	[-1.39481590745936, -1.00795256186321]	0.0192164	-1.03855	[-1.45454275076173, -1.03855234260077]
570359592	arginyltransferase 1(ATE1)	11101	ATE1	0.0125886	-1.19497	[-1.84788735943344, -1.19497444263777]	0.0125	-1.28101	[-1.75416571251287, -1.28100990095153]
578811175	endoplasmic reticulum-golgi intermediate compartment 1(ERGIC1)	57222	ERGIC1	0.0111205	-2.11614	[-3.10964012227471, -2.11614005283211]	0.024212	-2.12344	[-2.84848012866851, -2.12344265937987]
578812166	nucleoporin 153(NUP153)	9972	NUP153	0.0104929	1.07369	[1.07369185711404, 1.48413989264118]	0.00412187	1.09852	[1.0985221405961, 1.41766007240093]
578827419	thrombospondin type 1 domain containing 4(THSD4)	79875	THSD4	0.000695641	-4.03213	[-5.39429244236013, -4.03213117537226]	0.0112547	-3.27228	[-4.47194565553784, -3.27228296146452]
578837026	pescadillo ribosomal biogenesis factor 1(PES1)	23481	PES1	0.000810455	1.67073	[1.67072651812276, 2.29450994451299]	0.00271284	1.33952	[1.33952161519703, 1.81106107898928]
767915156	TIA1 cytotoxic granule associated RNA binding protein(TIA1)	7072	TIA1	0.000844155	1.66288	[1.66287837836096, 2.2185110565526]	0.00548242	1.61953	[1.61952774063878, 2.172136184599]
767929051	cyclin G associated kinase(GAK)	2580	GAK	0.0206437	-0.686115	[-0.994573201531012, -0.686115059757197]	0.0127858	-0.949097	[-1.18506154380153, -0.94909726250511]
767942600	methylenetetrahydrofolate dehydrogenase (NADP+ dependent) 1-like(MTHFD1L)	25902	MTHFD1L	0.00240813	2.25222	[2.25221554175822, 3.51800597362972]	0.000184256	2.28953	[2.28953217873511, 3.04996384496231]
767958755	tight junction protein 2(TJP2)	9414	TJP2	0.00671348	1.27922	[1.2792222095641, 2.09879488540961]	0.0120688	1.2823	[1.28229943286083, 2.13630587915407]
767997907	RNA guanine-7 methyltransferase(RNMT)	8731	RNMT	0.0476362	0.835133	[0.835132631339675, 1.42713999366803]	0.0246847	0.958043	[0.958042870257302, 1.46383686422093]
809281400	atlastin GTPase 2(ATL2)	64225	ATL2	0.00435025	1.60408	[1.60408442601122, 2.51359143101706]	0.00123883	2.02685	[2.02684980864405, 2.81105669944604]
1002341781	karyopherin subunit alpha 2(KPNA2)	3838	KPNA2	0.000433191	2.55127	[2.55127212702091, 3.33898099503428]	0.0109705	2.00436	[2.00435663383336, 2.70907127971372]
1004170672	cyclin dependent kinase 1(CDK1)	983	CDK1	0.00157914	2.92132	[2.92132106295563, 3.91380701507974]	0.0203788	1.83339	[1.83338697383545, 2.60797310151176]
1005880651	integrin subunit beta 4(ITGB4)	3691	ITGB4	0.0407128	1.25013	[1.25012969415413, 2.10546049586606]	0.00344746	1.92287	[1.92286990769793, 2.66573159364507]
1016080631	basigin (Ok blood group)(BSG)	682	BSG	0.0326319	1.81032	[1.81031608042396, 3.14652188660363]	0.0024288	2.03225	[2.03224871438024, 2.81365020729302]
1017029493	glutathione synthetase(GSS)	2937	GSS	0.000693261	-1.87009	[-2.33485381106366, -1.87008734165951]	0.000273009	-1.72447	[-2.32568067451871, -1.72447030252007]
1034555654	cellular retinoic acid binding protein 2(CRABP2)	1382	CRABP2	0.0370799	-2.373	[-3.99711890418167, -2.37300368503125]	0.0403325	-3.35951	[-4.93492692567434, -3.35950805634978]
1034571673	tripartite motif containing 3(TRIM3)	10612	TRIM3	0.00294309	-1.77373	[-2.48108211802963, -1.7737277261495]	0.0449952	-1.19155	[-1.90065087109572, -1.19154595771285]
1034572967	triokinase and FMN cyclase(TKFC)	26007	TKFC	0.00615329	-1.86007	[-2.56663117943654, -1.86007435948026]	0.0240374	-1.62793	[-2.34913977379586, -1.62793189804445]
1034576106	embryonic ectoderm development(EED)	8726	EED	0.00708916	1.30548	[1.30547552352816, 1.91143693604326]	0.0183455	1.12581	[1.12580933607917, 1.71001615970864]
1034587017	kinectin 1(KTN1)	3895	KTN1	0.0124292	-1.21753	[-1.87342719078529, -1.21753256922883]	0.0248229	-1.3145	[-1.93102144236855, -1.31450166000742]
1034590514	isovaleryl-CoA dehydrogenase(IVD)	3712	IVD	0.00513794	-2.25761	[-3.24152279459365, -2.25760914664603]	0.000358866	-2.42256	[-3.15345029962475, -2.42256350195301]
1034604114	NPC intracellular cholesterol transporter 1(NPC1)	4864	NPC1	0.00261356	1.55187	[1.55187350695846, 2.2686184827929]	0.0013299	1.59088	[1.59088347788465, 2.09373494852288]
1034604510	RAB27B, member RAS oncogene family(RAB27B)	5874	RAB27B	0.00194856	-4.2373	[-5.92549277100694, -4.23730112642236]	0.00633764	-3.61137	[-4.85114853785362, -3.61136608632595]
1034604883	haloacid dehalogenase like hydrolase domain containing 2(HDHD2)	84064	HDHD2	0.0141957	-1.29906	[-1.95967920029853, -1.29906328382369]	0.0461558	-1.16928	[-1.65878314751674, -1.16927928343726]
1034629275	Ran GTPase activating protein 1(RANGAP1)	5905	RANGAP1	0.0159226	0.658703	[0.65870278103796, 0.924425961723659]	0.0269283	0.64419	[0.644189605483216, 0.870153970330556]
1034634976	3-hydroxybutyrate dehydrogenase, type 1(BDH1)	622	BDH1	0.035236	-1.91092	[-3.0348936214715, -1.9109226989293]	0.048586	-1.64356	[-2.64765432986744, -1.64356354461142]
1034636253	guanine monophosphate synthase(GMPS)	8833	GMPS	0.0024429	1.5552	[1.55519588202145, 2.21851626045105]	0.00503413	1.33108	[1.3310751818816, 1.90610486516067]
1034643585	carboxymethylenebutenolidase homolog(CMBL)	134147	CMBL	0.000480787	-3.68492	[-4.84824257200546, -3.68491838599636]	0.000886168	-3.75755	[-4.61644369014427, -3.75755406206951]
1034663579	structural maintenance of chromosomes 2(SMC2)	10592	SMC2	9.25e-05	2.22254	[2.22253974306762, 2.86771897538426]	8.31e-05	2.17405	[2.17405376958482, 2.69889215690874]
1034665350	nuclear factor I B(NFIB)	4781	NFIB	0.00809713	2.69735	[2.69734798454341, 4.32827229305893]	0.000125285	3.82155	[3.8215466311766, 4.94322467608048]

## Sheet: 34 biomarkers
34 proteins/genes from TN vs. LA/LB1; blue represents the up-regulated genes in Luminal and high expressed samples were associated with good survival, red represents the up-regulated genes in TN and high expressed samples were associated with worse survival
				From Differential Aanalyses								From Survival Analyses
Genes	Entrez Gene ID	Protein Accession	Description	logFC(TN/LB1LA)	adj.P.Val (TN vs. LB1LA)	adj.P_representative (TN vs. LA)	log2FC_representative (TN/LA)	log2FC (range, TN/ LA)	adj.P_representative (TN vs. LB1)	log2FC_representative (TN/LB1)	log2FC (range, TN/ LB1)	HR with 95% CI (OS)	log-rank p (OS)	HR with 95% CI (PFI)	logrank p (PFI)	Pearson Correlation (gene-protein from TCGA-CPTAC)
REEP6	92840	19923919	receptor accessory protein 6(REEP6)	-5.14363	0.000368376	0.00179762	-5.1284	[-6.96974954789174, -5.12839661068008]	0.0148877	-3.95701	[-5.28332115969363, -3.95701074072682]	0.678440809 [0.465743968, 0.988272447]	0.0419519	0.678440809 [0.465743968, 0.988272447]	0.0420587	0.697984
AGR3	155465	28827801	anterior gradient 3, protein disulphide isomerase family member(AGR3)	-5.50819	0.000137904	0.0030089	-4.54785	[-6.29485720893552, -4.54784706344094]	0.00889683	-4.7548	[-6.72244206319005, -4.75480457916482]	0.608073877 [0.400741152, 0.922674995]	0.0181705	0.608073877 [0.400741152, 0.922674995]	0.0181399	0.726982
ADIRF	10974	5802976	adipogenesis regulatory factor(ADIRF)	-5.15236	0.00106812	0.00548931	-4.35402	[-6.61403899412385, -4.35402377818233]	0.0336721	-4.2027	[-6.18735488793328, -4.20269842124214]	0.420382885 [0.219325426, 0.805751404]	0.00708248	0.420382885 [0.219325426, 0.805751404]	0.00708631	0.574332
THSD4	79875	578827419	thrombospondin type 1 domain containing 4(THSD4)	-4.14	8.4e-05	0.000695641	-4.03213	[-5.39429244236013, -4.03213117537226]	0.0112547	-3.27228	[-4.47194565553784, -3.27228296146452]	0.660884294 [0.449481964, 0.971714295]	0.0339458	0.660884294 [0.449481964, 0.971714295]	0.0339726	0.62843
MLPH	79083	109826351	melanophilin(MLPH)	-4.35065	0.000168409	0.00139443	-4.03022	[-5.6477721733837, -4.0302164722845]	0.0109588	-3.37703	[-4.80109420044401, -3.37702971657385]	0.525376535 [0.357511318, 0.772060883]	0.000862036	0.525376535 [0.357511318, 0.772060883]	0.000860974	0.62454
ABAT	18	188536080	4-aminobutyrate aminotransferase(ABAT)	-4.0611	0.000489142	0.00359342	-3.37074	[-5.20494874558962, -3.37074483038084]	0.01171	-3.45848	[-4.593224415958, -3.45847725812537]	0.626136852 [0.426056707, 0.920176473]	0.0161724	0.626136852 [0.426056707, 0.920176473]	0.0161682	0.747222
STARD10	10809	116812600	StAR related lipid transfer domain containing 10(STARD10)	-4.24917	0.00264248	0.00610864	-3.19746	[-4.59574279762379, -3.19746338859979]	0.0395324	-3.69187	[-5.35225285762754, -3.69187320276708]	0.456446719 [0.275154964, 0.75718644]	0.00183952	0.456446719 [0.275154964, 0.75718644]	0.00183508	0.765575
ACADSB	36	4501859	acyl-CoA dehydrogenase, short/branched chain(ACADSB)	-3.38332	0.000189474	0.00227358	-2.76622	[-3.72824376842457, -2.76622469161662]	0.00746139	-2.99714	[-3.95942803614845, -2.99713984989025]	0.58301218 [0.370473052, 0.917484282]	0.0182513	0.58301218 [0.370473052, 0.917484282]	0.0182262	0.809707
CIRBP	1153	4502847	cold inducible RNA binding protein(CIRBP)	-2.46296	4.08e-05	0.000141479	-2.54855	[-3.12682518988751, -2.54855088622807]	0.0169631	-1.88012	[-2.6904992684837, -1.88011635352772]	0.599007548 [0.401701792, 0.893224899]	0.0110447	0.599007548 [0.401701792, 0.893224899]	0.0110559	0.607209
PHPT1	29085	24475861	phosphohistidine phosphatase 1(PHPT1)	-2.06028	1.44e-05	0.000368456	-2.14575	[-2.83940207866558, -2.14574892959118]	0.00780289	-1.5314	[-2.14974347431938, -1.53140061066048]	0.631335231 [0.428121373, 0.931007417]	0.0192339	0.631335231 [0.428121373, 0.931007417]	0.0192549	0.371614
NME3	4832	37693993	NME/NM23 nucleoside diphosphate kinase 3(NME3)	-2.32652	4e-05	0.00544725	-1.81871	[-2.68592112539957, -1.81871099179932]	0.00310907	-2.04725	[-2.65783194060848, -2.04724676007766]	0.447898489 [0.266705444, 0.752189582]	0.00182146	0.447898489 [0.266705444, 0.752189582]	0.00182361	0.679726
HSD17B8	7923	15277342	hydroxysteroid 17-beta dehydrogenase 8(HSD17B8)	-1.64513	0.00114311	0.00477186	-1.7945	[-2.57380469481843, -1.79450334140335]	0.0472296	-1.16806	[-1.74170877558547, -1.16806493859552]	0.575028609 [0.393424629, 0.840460605]	0.00381781	0.575028609 [0.393424629, 0.840460605]	0.0038375	0.542131
GMPR2	51292	50541948	guanosine monophosphate reductase 2(GMPR2)	-1.81519	3.58e-05	0.000411996	-1.7609	[-2.30673279718022, -1.7609017658752]	0.0122429	-1.2899	[-1.93169515533536, -1.28990068335828]	0.635618391 [0.436360031, 0.925865594]	0.0172469	0.635618391 [0.436360031, 0.925865594]	0.0173116	0.645683
SSH3	54961	239582767	slingshot protein phosphatase 3(SSH3)	-1.93173	0.000489142	0.00252799	-1.66696	[-2.28066464079321, -1.66696038610001]	0.0191886	-1.63651	[-2.25393478749092, -1.63651292436966]	0.544172271 [0.342818281, 0.863791333]	0.00879243	0.544172271 [0.342818281, 0.863791333]	0.00880663	0.796319
PREX1	57580	34452732	phosphatidylinositol-3,4,5-trisphosphate dependent Rac exchange factor 1(PREX1)	-1.80426	0.00391291	0.0224333	-1.48809	[-2.57469531127352, -1.48808769997231]	0.048131	-1.38579	[-2.0909470703335, -1.38578977852546]	0.435701692 [0.227159246, 0.835695522]	0.010108	0.435701692 [0.227159246, 0.835695522]	0.0101135	0.79011
HAGH	3029	94538320	hydroxyacylglutathione hydrolase(HAGH)	-1.6276	0.000199263	0.00759564	-1.43588	[-1.9608616527336, -1.43587702631665]	0.00450248	-1.35902	[-1.82969339498732, -1.35902120971426]	0.488049675 [0.237511133, 1.00286872]	0.0461257	0.488049675 [0.237511133, 1.00286872]	0.0461427	0.735035
NT5C	30833	7657033	5', 3'-nucleotidase, cytosolic(NT5C)	-1.28414	0.00114311	0.00386959	-1.2905	[-1.73711547952877, -1.29050179558298]	0.0439223	-0.9337	[-1.33651346490435, -0.933700243149687]	0.56642591 [0.35474632, 0.904416178]	0.0158279	0.56642591 [0.35474632, 0.904416178]	0.015849	0.393657
FIS1	51024	151108473	fission, mitochondrial 1(FIS1)	-1.57455	0.000655872	0.0165282	-1.14118	[-1.78126558652695, -1.14118427180221]	0.026587	-1.34274	[-1.87087553718199, -1.34274388142061]	0.643431301 [0.432565954, 0.957088358]	0.0282351	0.643431301 [0.432565954, 0.957088358]	0.0281751	0.393956
AHCYL1	10768	21361647	adenosylhomocysteinase like 1(AHCYL1)	-1.39783	0.000631842	0.0150006	-1.0776	[-1.67887678010899, -1.07759875083162]	0.0178859	-1.13875	[-1.60632310027271, -1.13875187492599]	0.671163615 [0.457431598, 0.984760563]	0.0402226	0.671163615 [0.457431598, 0.984760563]	0.0402581	0.635847
MDP1	145553	33457311	magnesium dependent phosphatase 1(MDP1)	-1.07902	0.00249614	0.0337953	-0.857335	[-1.43563120400853, -0.857335434906493]	0.0433263	-0.825378	[-1.28140635884778, -0.825377551022205]	0.596686175 [0.409309607, 0.869841278]	0.00662904	0.596686175 [0.409309607, 0.869841278]	0.0066565	0.579624
ANKS1A	23294	140161500	ankyrin repeat and sterile alpha motif domain containing 1A(ANKS1A)	0.860916	0.000761748	0.0344143	0.635579	[0.635579275110396, 0.958919204689452]	0.0327507	0.726769	[0.726769364641824, 1.0562372347705]	1.458709286 [0.999116964, 2.129713393]	0.0491864	1.458709286 [0.999116964, 2.129713393]	0.0491667	0.580036
GART	2618	209869993	phosphoribosylglycinamide formyltransferase, phosphoribosylglycinamide synthetase, phosphoribosylaminoimidazole synthetase(GART)	1.02873	0.000189474	0.00146515	1.09158	[1.09157638922109, 1.40336820981205]	0.0243099	0.792968	[0.792968252325821, 1.08745482947946]	2.047863716 [1.203470246, 3.484710831]	0.00694281	2.047863716 [1.203470246, 3.484710831]	0.00691649	0.557428
SRPK1	6732	47419936	SRSF protein kinase 1(SRPK1)	1.43579	0.000420506	0.0227623	1.19557	[1.1955728001894, 1.73122916927835]	0.0218853	1.17481	[1.17481198102729, 1.67037953463079]	1.838881582 [1.065619699, 3.173257286]	0.0262767	1.838881582 [1.065619699, 3.173257286]	0.026296	0.621513
PNP	4860	157168362	purine nucleoside phosphorylase(PNP)	1.72291	0.000189474	0.0147426	1.20133	[1.20133265841559, 1.9529059811128]	0.0164024	1.383	[1.38300306907926, 2.10173479706002]	1.78549134 [1.222072699, 2.608665856]	0.00238341	1.78549134 [1.222072699, 2.608665856]	0.00238527	0.73071
PLOD1	5351	32307144	procollagen-lysine,2-oxoglutarate 5-dioxygenase 1(PLOD1)	2.05029	0.000168409	0.0277804	1.26768	[1.26768433633014, 2.0824040293206]	0.00723094	1.80321	[1.80320983955743, 2.51842239966814]	1.774697619 [1.16458938, 2.704431017]	0.0068279	1.774697619 [1.16458938, 2.704431017]	0.00683828	0.64756
TJP2	9414	767958755	tight junction protein 2(TJP2)	1.7495	3.71e-05	0.00671348	1.27922	[1.2792222095641, 2.09879488540961]	0.0120688	1.2823	[1.28229943286083, 2.13630587915407]	1.518665793 [1.038154929, 2.221581505]	0.0301185	1.518665793 [1.038154929, 2.221581505]	0.030124	0.489098
MTHFD2	10797	94721354	methylenetetrahydrofolate dehydrogenase (NADP+ dependent) 2, methenyltetrahydrofolate cyclohydrolase(MTHFD2)	1.89963	0.00118695	0.0498143	1.39303	[1.39303017673138, 2.07432594165901]	0.0138942	1.69981	[1.69981027648521, 2.34562641068624]	1.484266949 [0.998283215, 2.20683704]	0.0495133	1.484266949 [0.998283215, 2.20683704]	0.0495934	0.771248
NCBP1	4686	4505343	nuclear cap binding protein subunit 1(NCBP1)	1.53222	5.7e-06	0.00218942	1.43096	[1.43096098700867, 2.03095938555234]	0.00630237	1.00688	[1.0068831400151, 1.61928904072272]	2.659365768 [1.344255943, 5.261071245]	0.00346566	2.659365768 [1.344255943, 5.261071245]	0.00346421	0.282588
TIA1	7072	767915156	TIA1 cytotoxic granule associated RNA binding protein(TIA1)	1.91682	2.16e-05	0.000844155	1.66288	[1.66287837836096, 2.2185110565526]	0.00548242	1.61953	[1.61952774063878, 2.172136184599]	1.504800885 [1.028655515, 2.201345027]	0.0339934	1.504800885 [1.028655515, 2.201345027]	0.0340131	0.431874
ASNS	440	296010848	asparagine synthetase (glutamine-hydrolyzing)(ASNS)	2.59476	4e-05	0.00500128	2.12227	[2.122274724471, 3.07073851972014]	0.00598324	2.11849	[2.1184891310306, 2.97569811101656]	1.593870601 [1.005824013, 2.525713704]	0.0452143	1.593870601 [1.005824013, 2.525713704]	0.0452731	0.593159
MTHFD1L	25902	767942600	methylenetetrahydrofolate dehydrogenase (NADP+ dependent) 1-like(MTHFD1L)	2.70191	1.72e-07	0.00240813	2.25222	[2.25221554175822, 3.51800597362972]	0.000184256	2.28953	[2.28953217873511, 3.04996384496231]	1.472519272 [1.007774076, 2.15158641]	0.044204	1.472519272 [1.007774076, 2.15158641]	0.0442892	0.656422
FSCN1	6624	4507115	fascin actin-bundling protein 1(FSCN1)	3.35881	8.83e-08	0.00370641	2.30491	[2.30491207362099, 3.42130497588997]	7.41e-05	3.29849	[3.29848517707296, 4.30627849947397]	1.482566877 [1.016576047, 2.162164407]	0.0395626	1.482566877 [1.016576047, 2.162164407]	0.0396626	0.701988
KPNA2	3838	1002341781	karyopherin subunit alpha 2(KPNA2)	2.52637	5.31e-05	0.000433191	2.55127	[2.55127212702091, 3.33898099503428]	0.0109705	2.00436	[2.00435663383336, 2.70907127971372]	1.458101986 [1.001110201, 2.123703663]	0.0479979	1.458101986 [1.001110201, 2.123703663]	0.0479631	0.661539
SLC2A1	6513	166795299	solute carrier family 2 member 1(SLC2A1)	6.65573	4.72e-09	0.00154911	5.16397	[5.16396781192014, 7.42608938885213]	3e-05	5.98604	[5.98603600091323, 8.0303283199363]	1.730651801 [1.017034059, 2.944990514]	0.0406174	1.730651801 [1.017034059, 2.944990514]	0.0406111	0.181827
